# Supplementary material
Source: publisher figshare collection journal article supplement (https://acs.figshare.com/ndownloader/files/5319445)
Supplement: Supplementary file 1 [file 5319445]

# Supporting Information

## Efficient Approach To Construct Unsymmetrical Biaryls through Oxidative Coupling Reactions of Aromatic Primary Alcohols and Arylboronic Acids with a Rhodium Catalyst

Xiaobo Yu,<sup>a, b, c</sup> Jingjing Wang,<sup>d</sup> Weijie Guo,<sup>a, b</sup> Yun Tian\*,<sup>a</sup> and Jianhui Wang\*,<sup>a, b</sup>

<sup>a</sup> Department of Chemistry, College of Science, Tianjin University, Tianjin 300072, P. R. China.

<sup>b</sup> Collaborative Innovation center of Chemical Science and Engineering (Tianjin), Tianjin 300072,  
P. R. China.

<sup>c</sup> College of Materials Science and Engineering, Jilin Institute of Chemical Technology, Jilin City  
132022, P. R.China.

<sup>d</sup> College of Chemistry and Chemical Engineering, Shangqiu Normal University, Shangqiu, Henan  
476000, P. R.China.

### Table of Contents

|                                                                   |        |
|-------------------------------------------------------------------|--------|
| General Information                                               | S4     |
| IR spectra for the reaction mixture                               | S5     |
| <sup>1</sup> H NMR and <sup>13</sup> C NMR Spectra of Materials   | S6-S15 |
| <sup>1</sup> H NMR and <sup>13</sup> C NMR Spectra of <b>1aa</b>  | S6     |
| <sup>1</sup> H NMR and <sup>13</sup> C NMR Spectra of <b>1ba</b>  | S7     |
| <sup>1</sup> H NMR and <sup>13</sup> C NMR Spectra of <b>1bb</b>  | S8     |
| <sup>1</sup> H NMR and <sup>13</sup> C NMR Spectra of <b>1bc</b>  | S9     |
| <sup>1</sup> H NMR and <sup>13</sup> C NMR Spectra of <b>1bd</b>  | S10    |
| <sup>1</sup> H NMR and <sup>13</sup> C NMR Spectra of <b>1be</b>  | S11    |
| <sup>1</sup> H NMR and <sup>13</sup> C NMR Spectra of <b>1bf</b>  | S12    |
| <sup>1</sup> H NMR and <sup>13</sup> C NMR Spectra of <b>1c</b>   | S13    |
| <sup>1</sup> H NMR and <sup>13</sup> C NMR Spectra of <b>1d</b>   | S14    |
| <sup>1</sup> H NMR and <sup>13</sup> C NMR Spectra of <b>1aa'</b> | S15    |

|                                                                                    |         |
|------------------------------------------------------------------------------------|---------|
| Experimental Procedure for Products                                                | S16     |
| <sup>1</sup> H NMR, <sup>13</sup> C NMR and <sup>19</sup> F NMR Spectra of Product | S17-S48 |
| <sup>1</sup> H NMR and <sup>13</sup> C NMR Spectra of <b>3aa</b>                   | S17     |
| <sup>1</sup> H NMR and <sup>13</sup> C NMR Spectra of <b>3ab</b>                   | S18     |
| <sup>1</sup> H NMR and <sup>13</sup> C NMR Spectra of <b>3ac</b>                   | S19     |
| <sup>1</sup> H NMR and <sup>13</sup> C NMR Spectra of <b>3ad</b>                   | S20     |
| <sup>19</sup> F NMR Spectra of <b>3ad</b>                                          | S21     |
| <sup>1</sup> H NMR and <sup>13</sup> C NMR Spectra of <b>3ae</b>                   | S22     |
| <sup>1</sup> H NMR and <sup>13</sup> C NMR Spectra of <b>3af</b>                   | S23     |
| <sup>1</sup> H NMR and <sup>13</sup> C NMR Spectra of <b>3ag</b>                   | S24     |
| <sup>1</sup> H NMR and <sup>13</sup> C NMR Spectra of <b>3ah</b>                   | S25     |
| <sup>1</sup> H NMR and <sup>13</sup> C NMR Spectra of <b>3ai</b>                   | S26     |
| <sup>1</sup> H NMR and <sup>13</sup> C NMR Spectra of <b>3aj</b>                   | S27     |
| <sup>1</sup> H NMR and <sup>13</sup> C NMR Spectra of <b>3ak</b>                   | S28     |
| <sup>19</sup> F NMR Spectra of <b>3ak</b>                                          | S29     |
| <sup>1</sup> H NMR and <sup>13</sup> C NMR Spectra of <b>3al</b>                   | S30     |
| <sup>1</sup> H NMR and <sup>13</sup> C NMR Spectra of <b>3am</b>                   | S31     |
| <sup>1</sup> H NMR and <sup>13</sup> C NMR Spectra of <b>3an</b>                   | S32     |
| <sup>1</sup> H NMR and <sup>13</sup> C NMR Spectra of <b>3ao</b>                   | S33     |
| <sup>19</sup> F NMR Spectra of <b>3ao</b>                                          | S34     |
| <sup>1</sup> H NMR and <sup>13</sup> C NMR Spectra of <b>3ap</b>                   | S35     |
| <sup>1</sup> H NMR and <sup>13</sup> C NMR Spectra of <b>3aq</b>                   | S36     |
| <sup>1</sup> H NMR and <sup>13</sup> C NMR Spectra of <b>3ar</b>                   | S37     |
| <sup>19</sup> F NMR Spectra of <b>3ar</b>                                          | S38     |
| <sup>1</sup> H NMR and <sup>13</sup> C NMR Spectra of <b>3as</b>                   | S39     |
| <sup>19</sup> F NMR Spectra of <b>3as</b>                                          | S40     |
| <sup>1</sup> H NMR and <sup>13</sup> C NMR Spectra of <b>3at</b>                   | S41     |
| <sup>19</sup> F NMR Spectra of <b>3at</b>                                          | S42     |
| <sup>1</sup> H NMR and <sup>13</sup> C NMR Spectra of <b>3ba</b>                   | S43     |
| <sup>1</sup> H NMR and <sup>13</sup> C NMR Spectra of <b>3bb</b>                   | S44     |

|                                                                |     |
|----------------------------------------------------------------|-----|
| $^1\text{H}$ NMR and $^{13}\text{C}$ NMR Spectra of <b>3bc</b> | S45 |
| $^1\text{H}$ NMR and $^{13}\text{C}$ NMR Spectra of <b>3bd</b> | S46 |
| $^1\text{H}$ NMR and $^{13}\text{C}$ NMR Spectra of <b>3be</b> | S47 |
| $^1\text{H}$ NMR and $^{13}\text{C}$ NMR Spectra of <b>3bf</b> | S48 |

**General Information.** The starting materials were synthesized and purified according to the literature procedures.<sup>1-4</sup> Other chemicals and reagents were obtained from commercial sources. All reactions were monitored by analytical thin layer chromatography on 0.20 mm Yantai Huagong silica gel plates and spots were detected by UV-absorption. Silica gel (200-300 mesh) (from Yantai Huagong Chem. Company, Ltd.) was used for flash chromatography.

NMR spectra were obtained on 400 MHz spectrometer with CDCl<sub>3</sub> as solvent. The chemical shifts are reported in ppm relative to CDCl<sub>3</sub> ( $\delta$  = 7.26) for <sup>1</sup>H NMR and relative to the central CDCl<sub>3</sub> resonance ( $\delta$  = 77.0) for <sup>13</sup>C NMR. For <sup>19</sup>F NMR, the (trifluoromethyl)benzene was used as an external standard. Coupling constants (J) are quoted in Hz for <sup>1</sup>H. Multiplicities are reported as follows: singlet (s), doublet (d), doublet of doublets (dd), triplet (t), quartet (q), and multiplet (m). Conversions were obtained by <sup>1</sup>H NMR analysis of the sample. NMR data of known compounds is in agreement with literature values. Infrared spectra were recorded on FT-IR spectrophotometer. Elemental analyses were performed by the Elemental Analysis Section of Tianjin University.

## IR spectra for the reaction mixture

To an oven-dried screwed vial were added benzo[h]quinoline-10-ylmethanol (0.3 mmol), Rh(PPh<sub>3</sub>)<sub>3</sub>Cl (19.5 mg) and xylene 3 mL under air atmosphere. The mixture was vigorously stirred at 130 °C for 5 h. Organic solvents were removed in vacuo, and then the residue was detected by IR (Figure S1) and an absorption peak of Rh-CO was found at 1976 cm<sup>-1</sup>.<sup>5</sup>

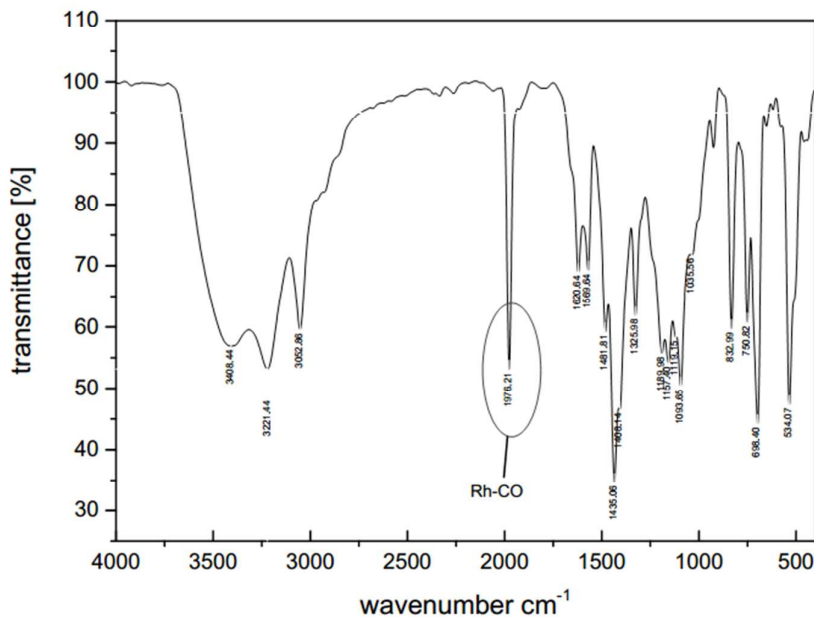

Figure S1. IR for the reaction mixture

## REFERENCES

- [1] Hamada, Y.; Takeuchi, I. *J. Org. Chem.* **1977**, 42, 4209–4213.
- [2] Kochi, T.; Urano, S.; Seki, H.; Mizushima, E.; Sato, M.; Kakiuchi, F. *J. Am. Chem. Soc.* **2009**, 131, 2792–2793.
- [3] Blanck, S.; Cruchter, T.; Vultur, A.; Riedel, R.; Harms, K.; Herlyn, M.; Meggers, E. *Organometallics* **2011**, 30, 4598–4606.
- [4] Liu, C.; Yang, W. *Chem. Comm.* **2009**, 6267–6269.
- [5] Ginsberg, A. P.; Edward Lindsell, W.; McCullough, K. J.; Sprinkle, C. R.; Welch, A. J. *J. Am. Chem. Soc.* **1986**, 108, 403–416.

# <sup>1</sup>H NMR and <sup>13</sup>C NMR Spectra of 1aa

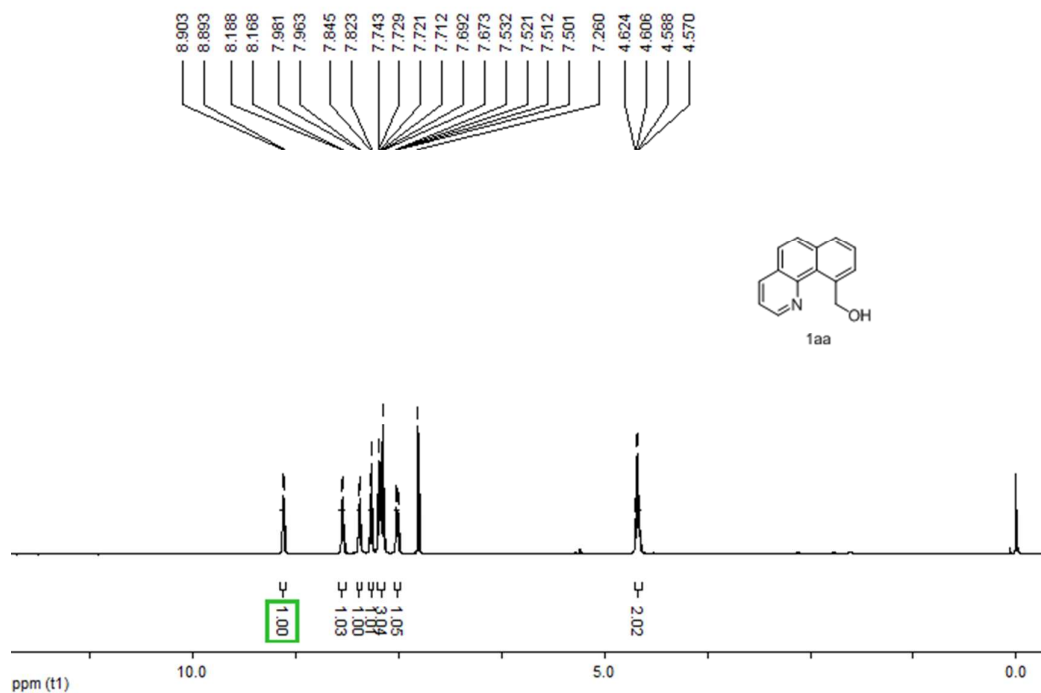

Figure S2. <sup>1</sup>H NMR for compound 1aa

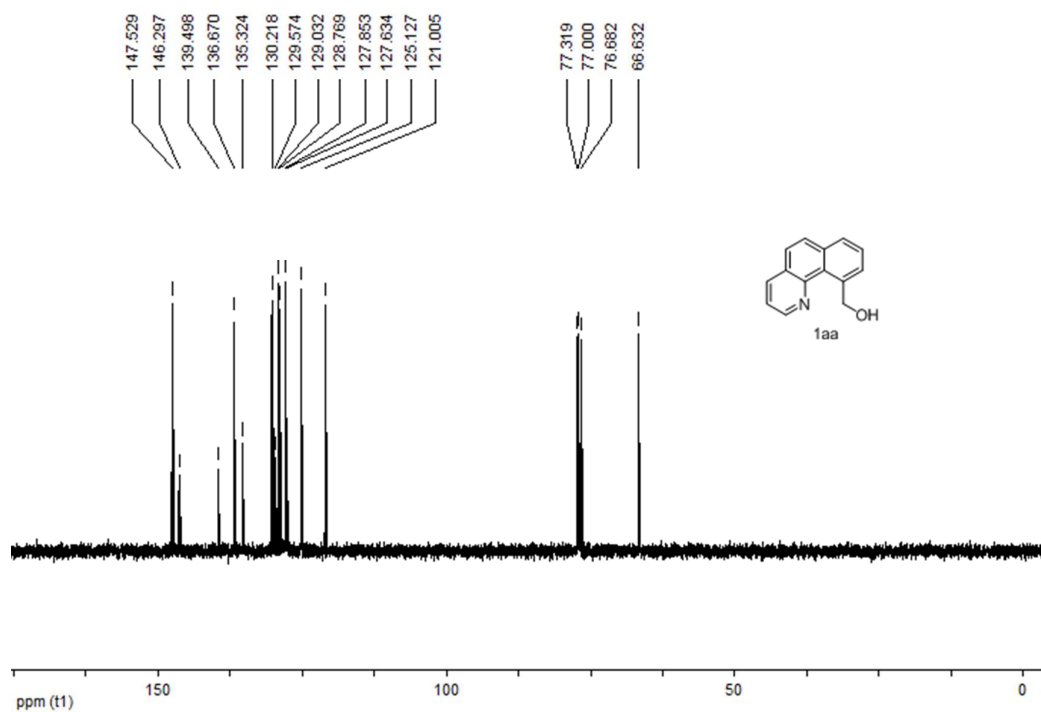

Figure S3. <sup>13</sup>C NMR for compound 1aa

# **$^1\text{H}$ NMR and $^{13}\text{C}$ NMR Spectra of 1ba**

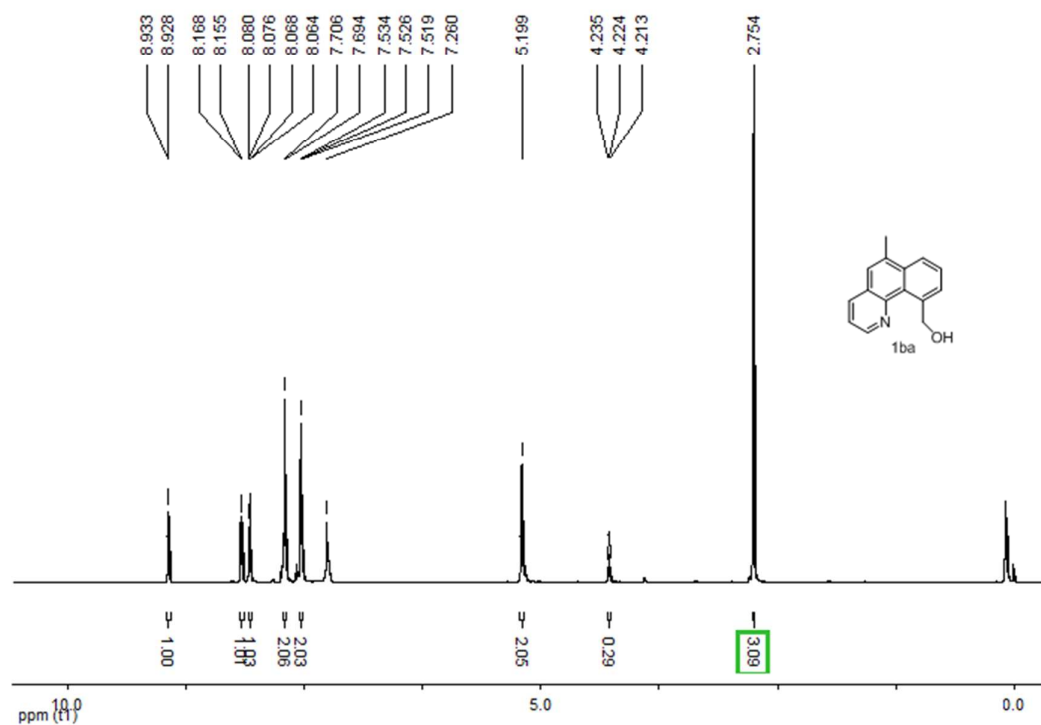

**Figure S4.  $^1\text{H}$  NMR for compound 1ba**

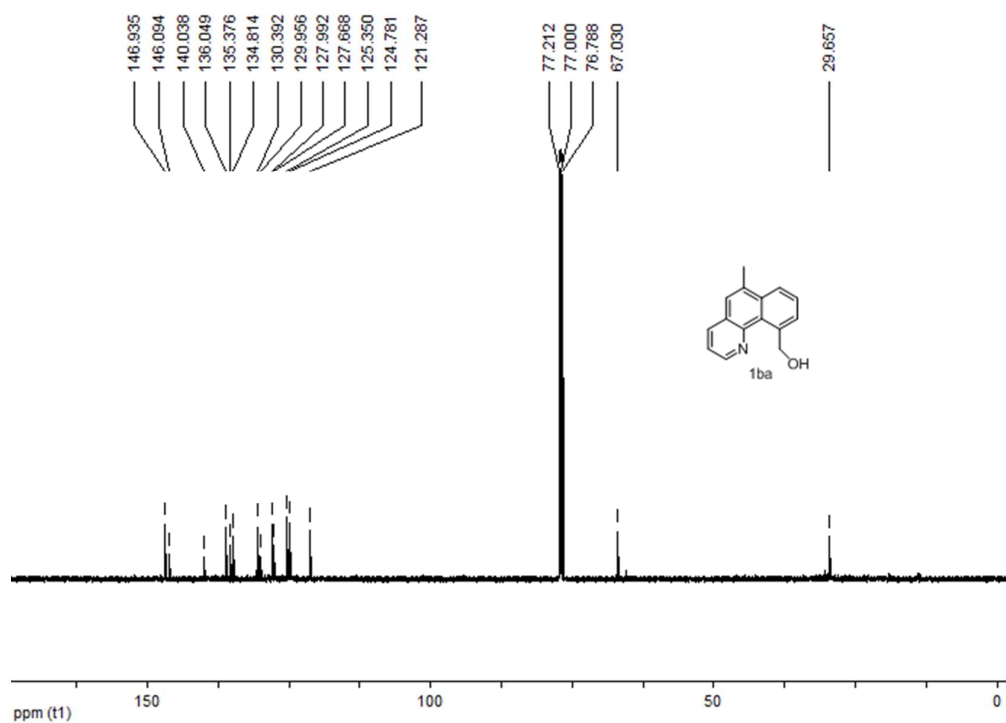

**Figure S5.  $^{13}\text{C}$  NMR for compound 1ba**

# <sup>1</sup>H NMR and <sup>13</sup>C NMR Spectra of 1bb

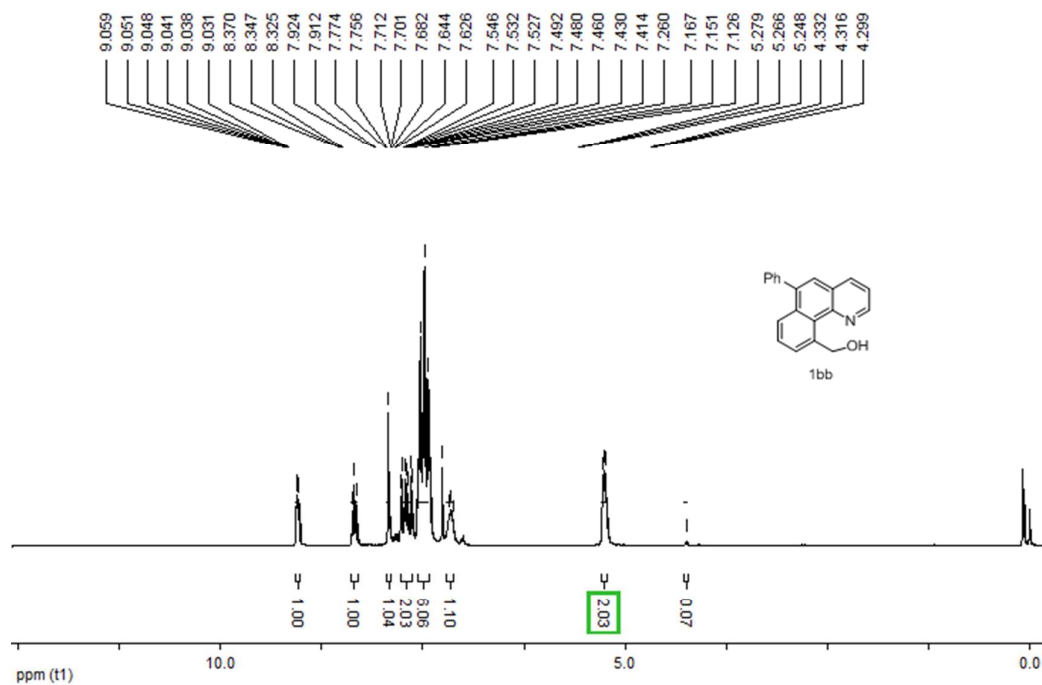

Figure S6. <sup>1</sup>H NMR for compound 1bb

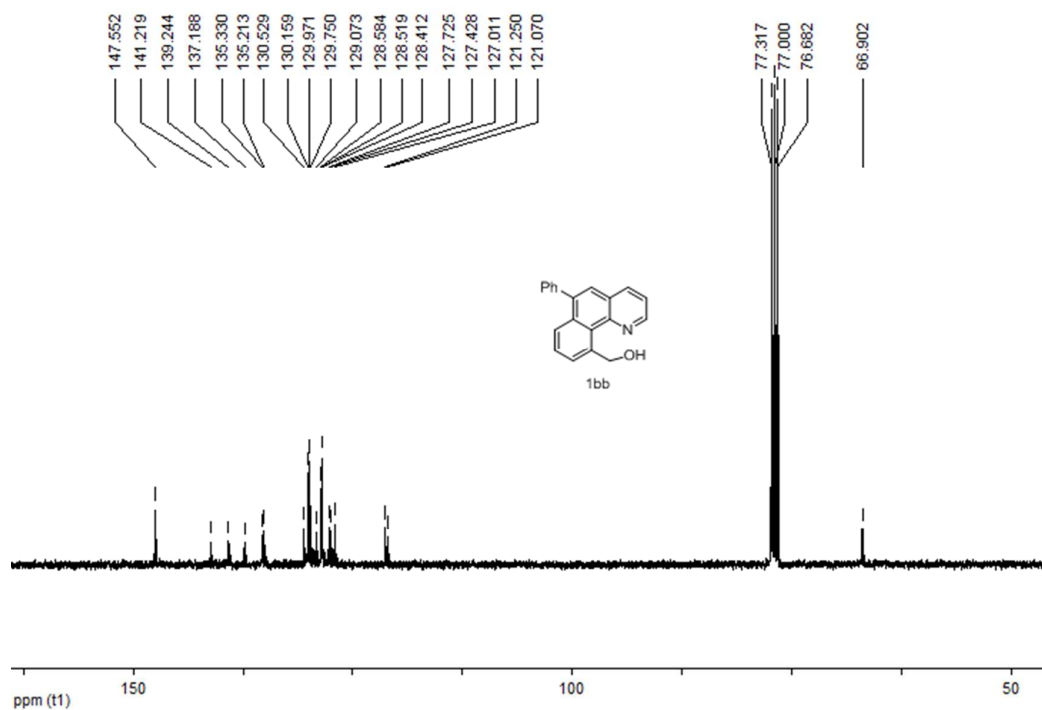

Figure S7. <sup>13</sup>C NMR for compound 1bb



## $^1\text{H}$ NMR and $^{13}\text{C}$ NMR Spectra of 1bc

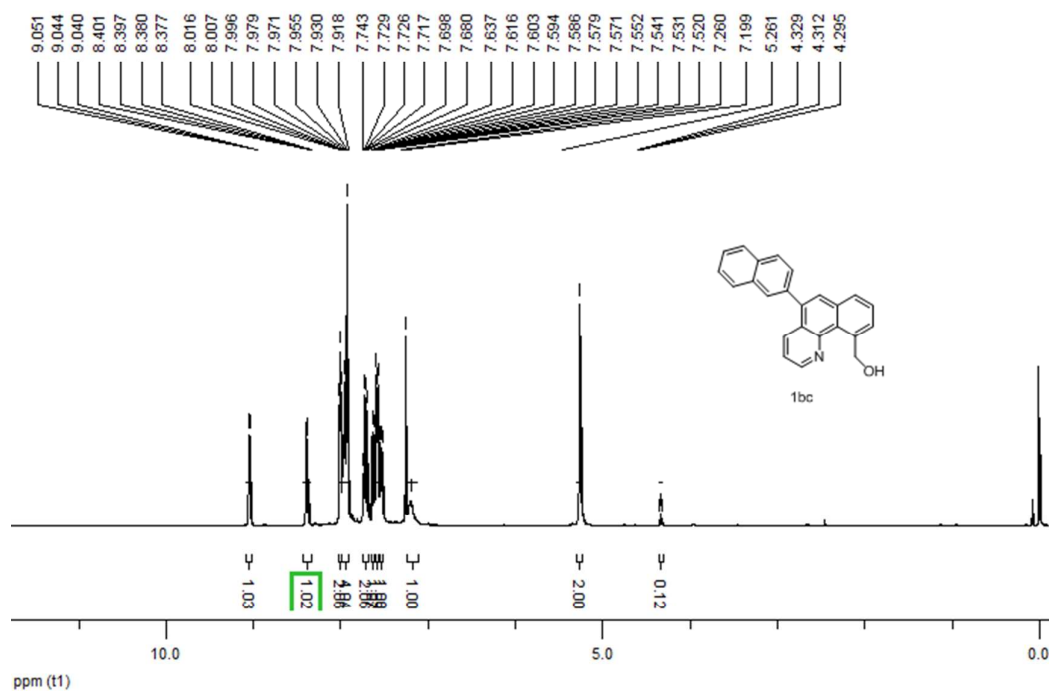

Figure S8.  $^1\text{H}$  NMR for compound 1bc

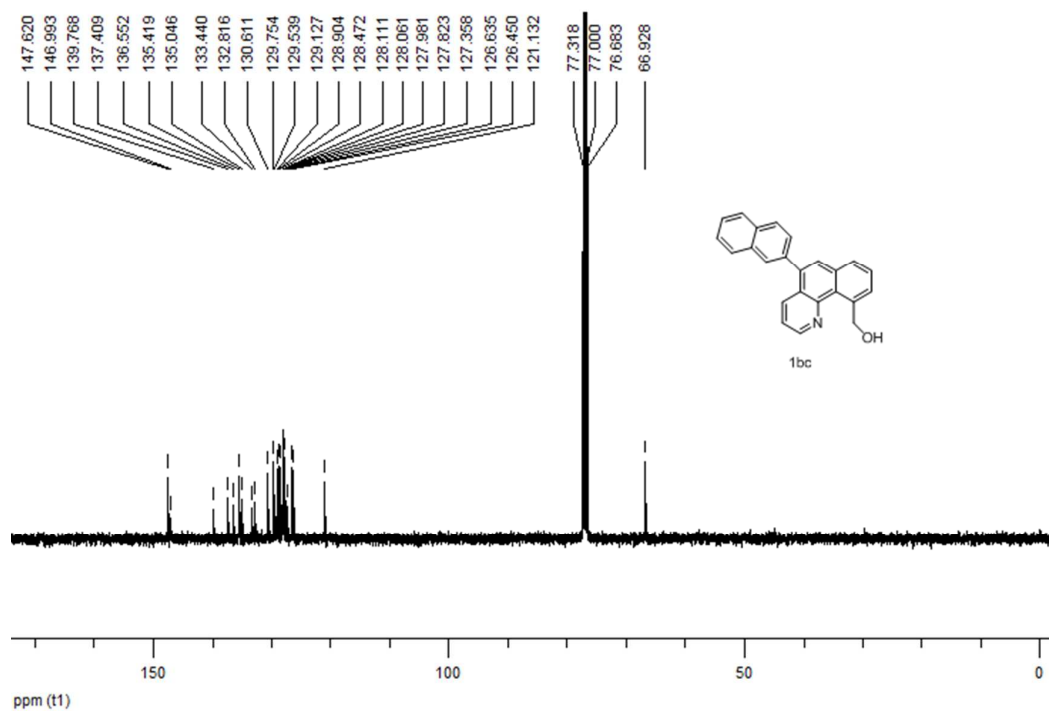

Figure S9.  $^{13}\text{C}$  NMR for compound 1bc

Chemical structure of 1bd: COc1ccc2c(c1)cnc3ccccc23

<sup>1</sup>H NMR spectrum (CDCl<sub>3</sub>) of compound 1bd. The x-axis represents chemical shift in ppm (t1), ranging from 0.0 to 10.0. The spectrum shows several peaks, with integration values indicated below the baseline. A peak at approximately 4.3 ppm is highlighted with a green box, showing an integration of 1.00.

| Chemical Shift (ppm) | Integration |
|----------------------|-------------|
| ~8.9                 | 1.00        |
| ~8.3                 | 1.00        |
| ~7.7                 | 1.00        |
| ~7.6                 | 1.07        |
| ~5.0                 | 1.99        |
| ~4.3 (highlighted)   | 1.00        |
| ~4.0                 | 0.03        |
| ~3.9                 | 3.05        |

Chemical structure of **1bd** (2-(hydroxymethyl)-6-methoxy-1,2,3,4-tetrahydroquinoline) is shown as an inset.

<sup>13</sup>C NMR spectrum (CDCl<sub>3</sub>) peaks (ppm):

| Peak (ppm) |
|------------|
| 155.335    |
| 147.695    |
| 146.436    |
| 136.804    |
| 131.774    |
| 130.807    |
| 130.686    |
| 128.020    |
| 126.517    |
| 124.491    |
| 122.464    |
| 121.317    |
| 106.968    |
| 77.318     |
| 77.000     |
| 76.683     |
| 66.608     |
| 55.793     |

S10

# <sup>1</sup>H NMR and <sup>13</sup>C NMR Spectra of 1be

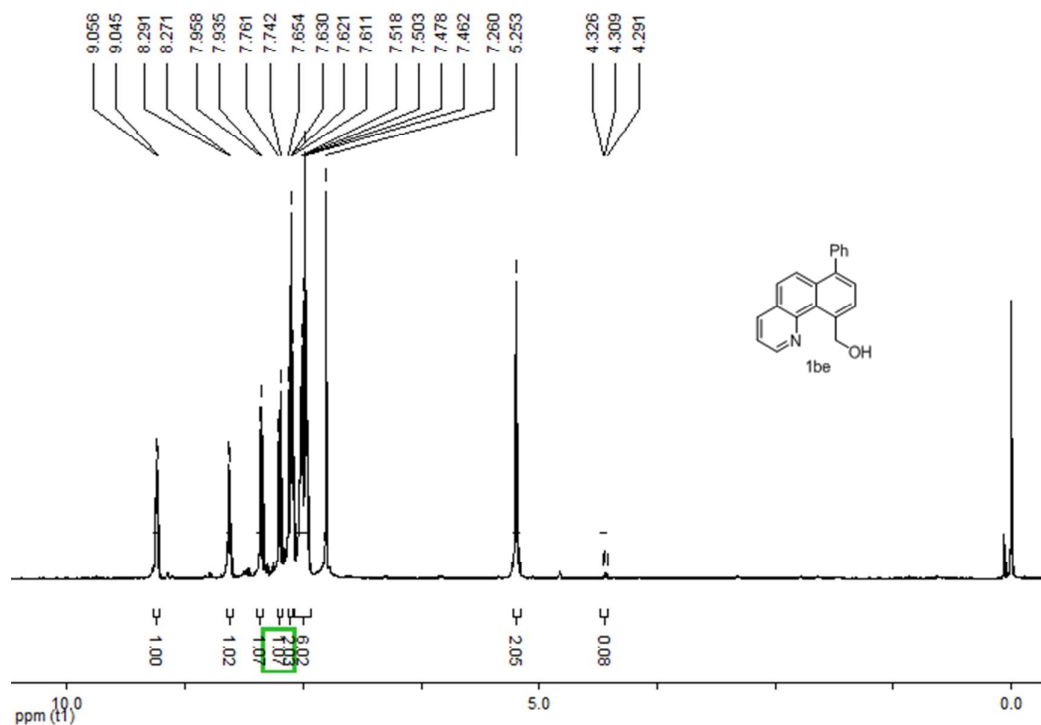

Figure S12. <sup>1</sup>H NMR for compound 1be

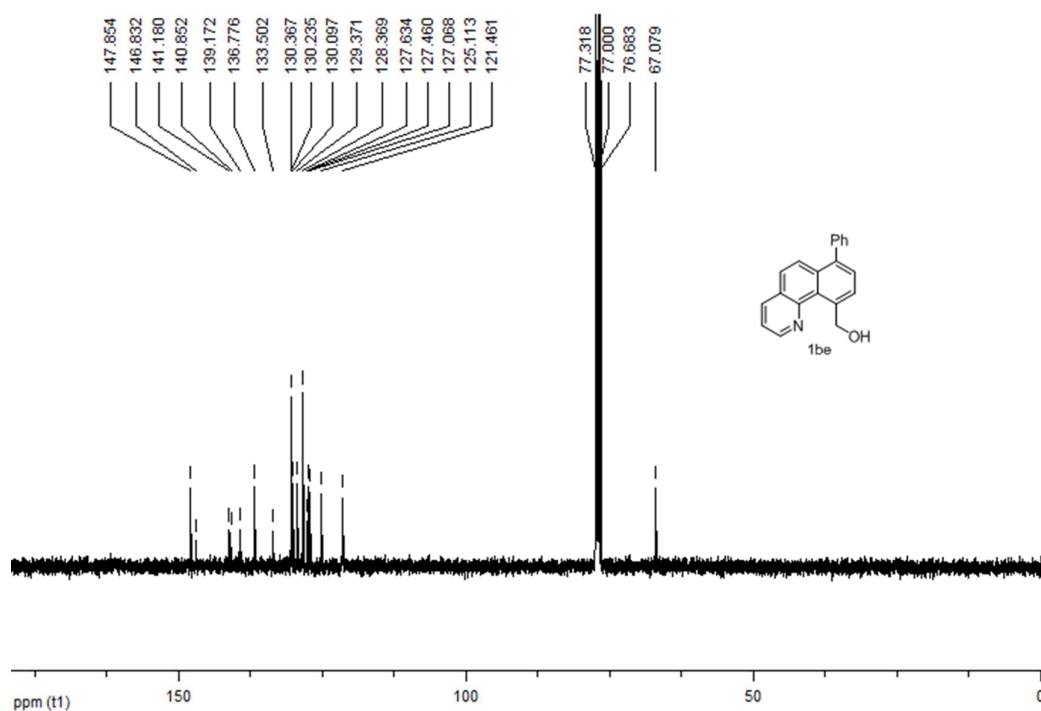

Figure S13. <sup>13</sup>C NMR for compound 1be

# <sup>1</sup>H NMR and <sup>13</sup>C NMR Spectra of 1bf

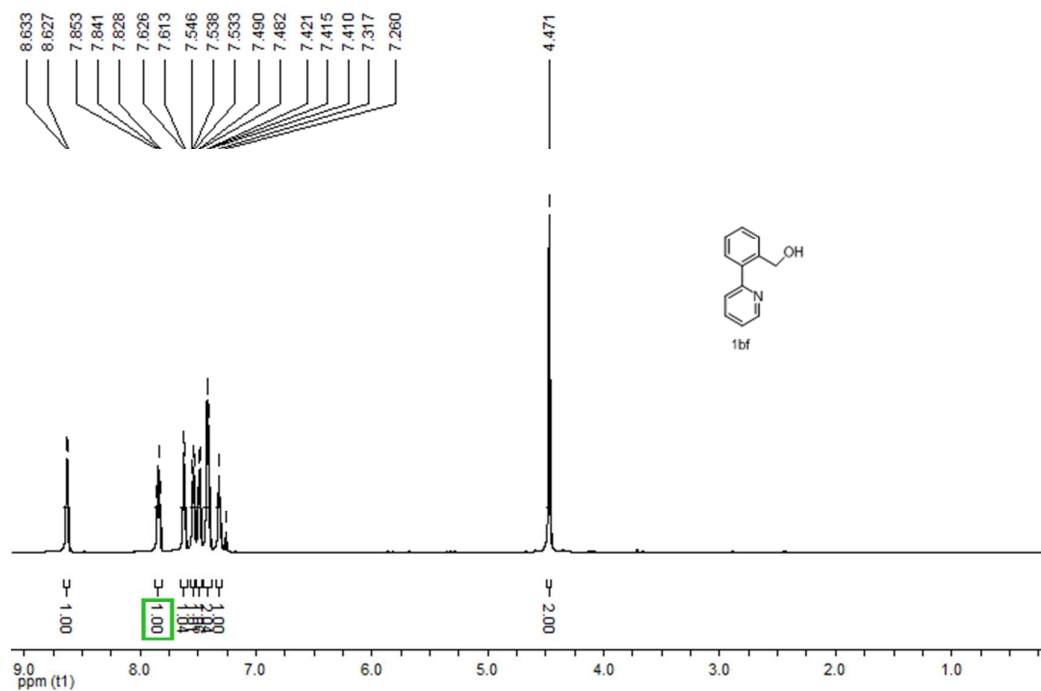

Figure S14. <sup>1</sup>H NMR for compound 1bf

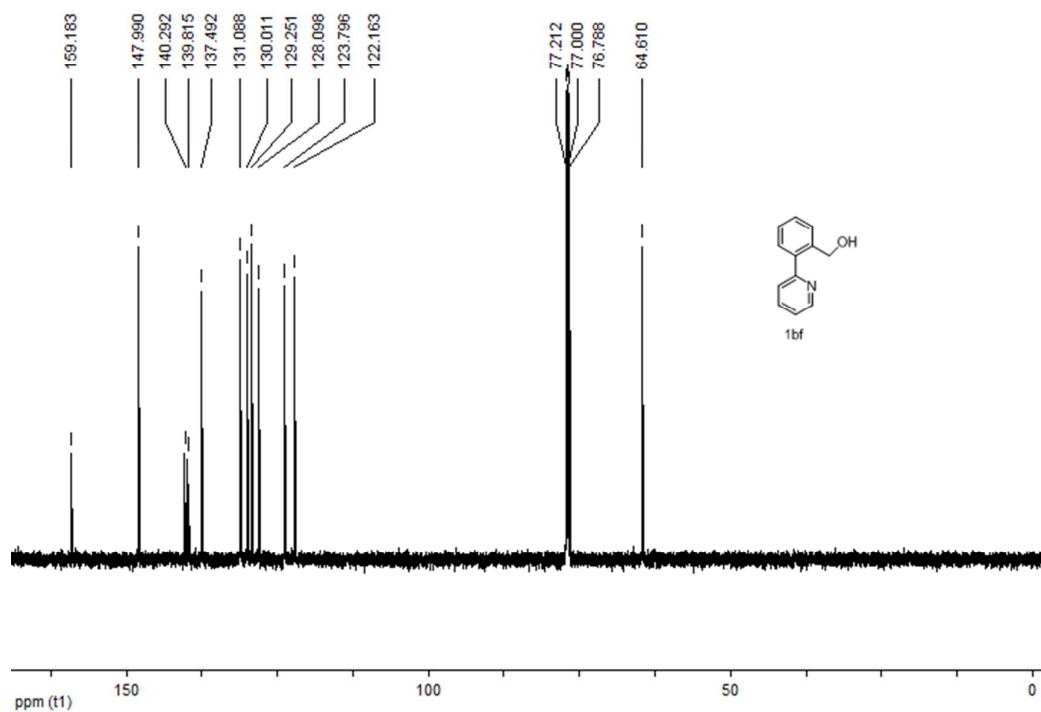

Figure S15. <sup>13</sup>C NMR for compound 1bf

# <sup>1</sup>H NMR and <sup>13</sup>C NMR Spectra of 1c

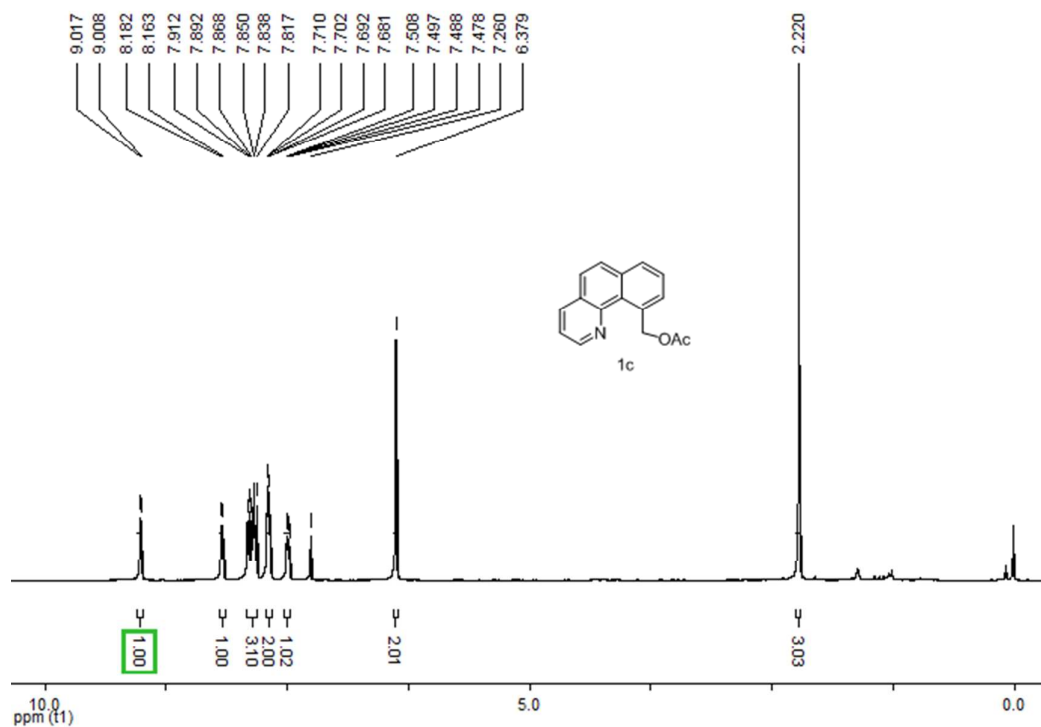

Figure S16. <sup>1</sup>H NMR for compound 1c

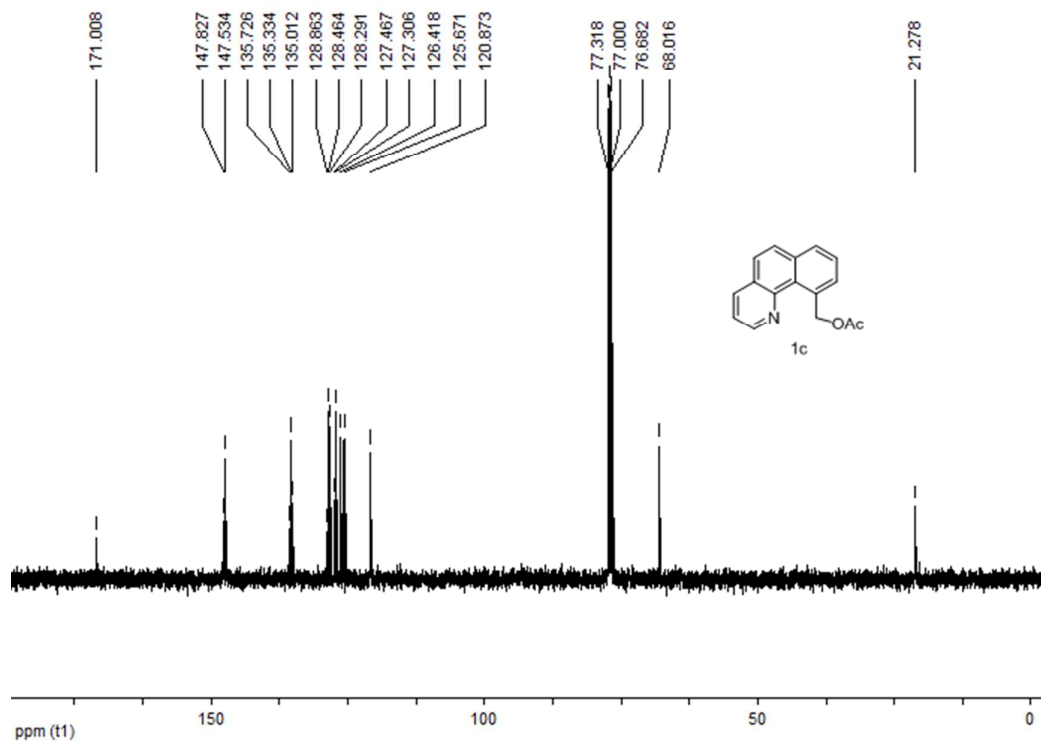

Figure S17. <sup>13</sup>C NMR for compound 1c

# <sup>1</sup>H NMR and <sup>13</sup>C NMR Spectra of 1d

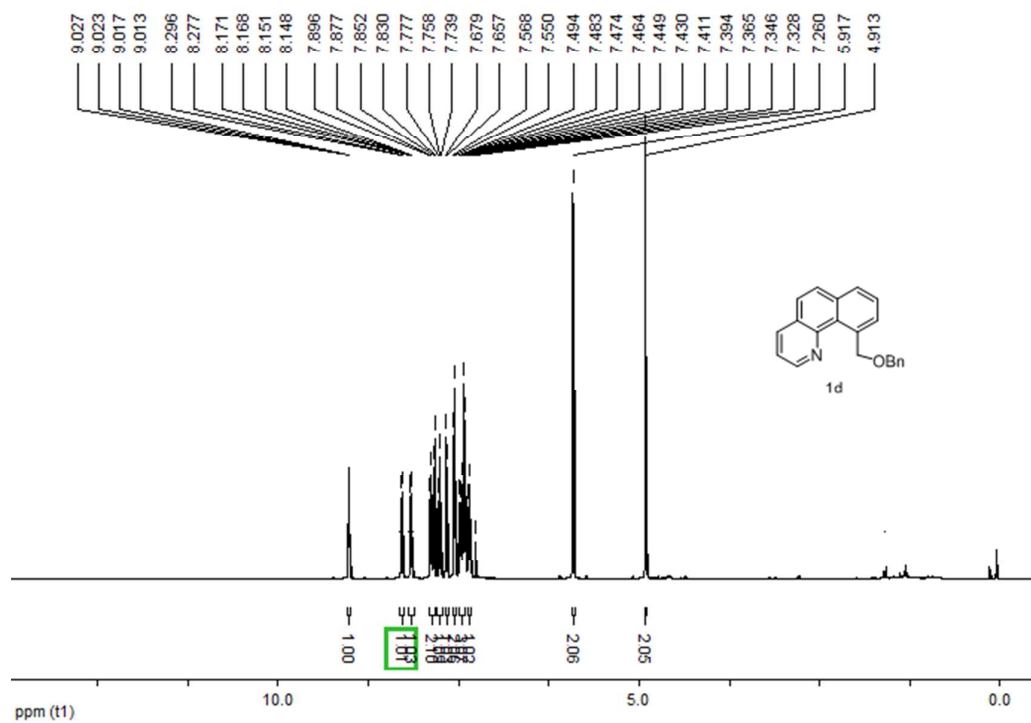

Figure S18. <sup>1</sup>H NMR for compound 1d

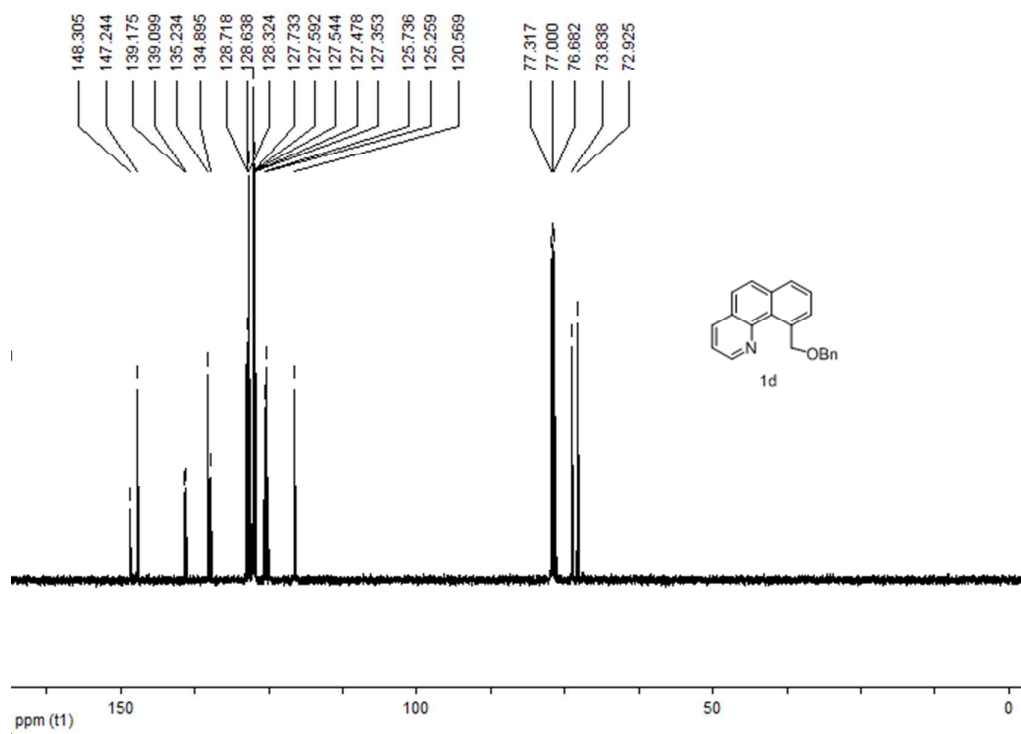

Figure S19. <sup>13</sup>C NMR for compound 1d

# <sup>1</sup>H NMR and <sup>13</sup>C NMR Spectra of 1aa'

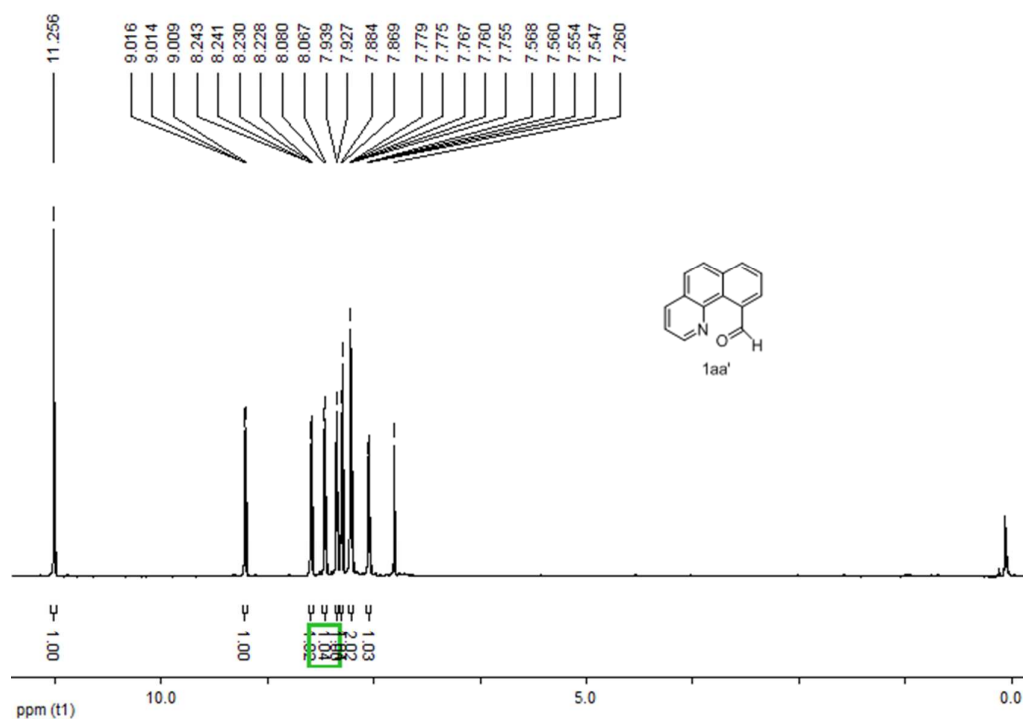

Figure S20. <sup>1</sup>H NMR for compound 1aa'

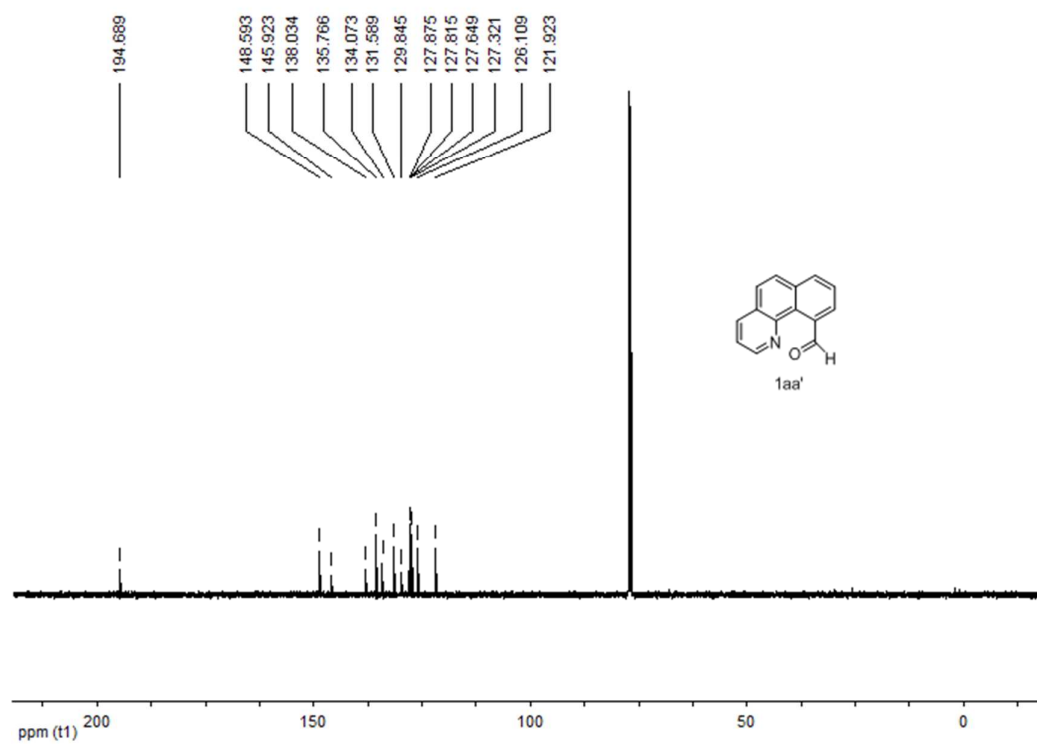

Figure S21. <sup>13</sup>C NMR for compound 1aa'

**Experimental Procedure for Rhodium-catalyzed Direct Arylation with Organoboron Compounds via Primary alcohols**

To an oven-dried screwed vial were added primary alcohol (0.1 mmol), substituted phenylboronic acid (0.2 mmol), copper (I) chloride (9.9 mg, 0.1 mmol),  $\text{Rh}(\text{PPh}_3)_3\text{Cl}$  (6.5 mg, 0.007 mmol) and xylene 1 mL under air atmosphere. The mixture was vigorously stirred at 130 °C to the end of the reaction. Organic solvents were removed in vacuo, and then the residue was purified by a silica gel column chromatography to give the desired product.



# <sup>1</sup>H NMR and <sup>13</sup>C NMR Spectra of 3aa

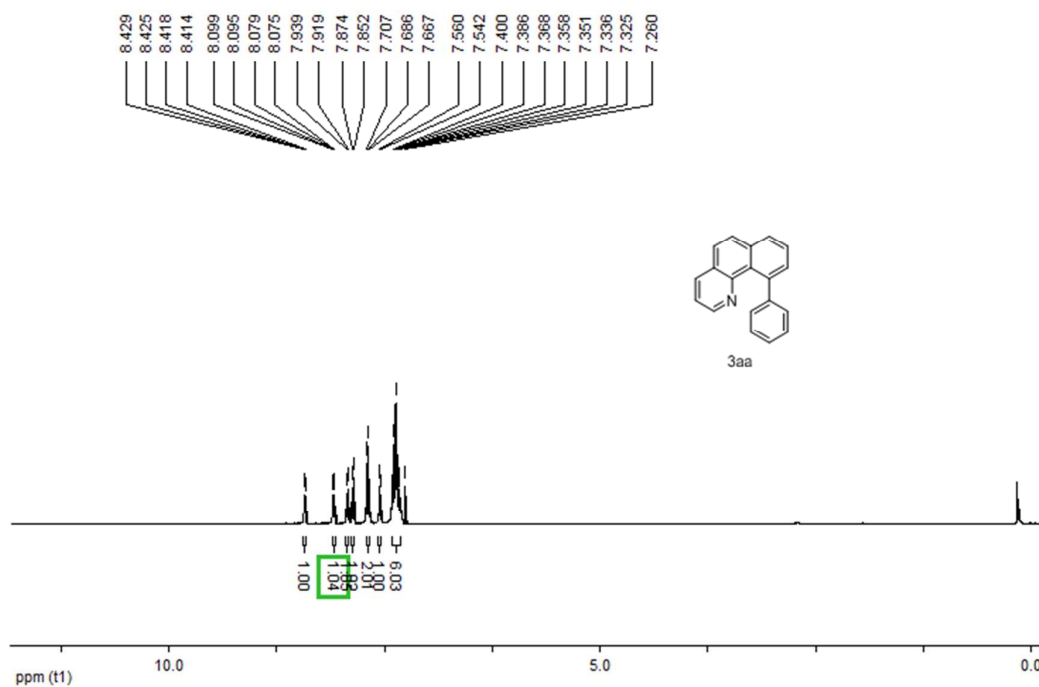

Figure S22. <sup>1</sup>H NMR for compound 3aa

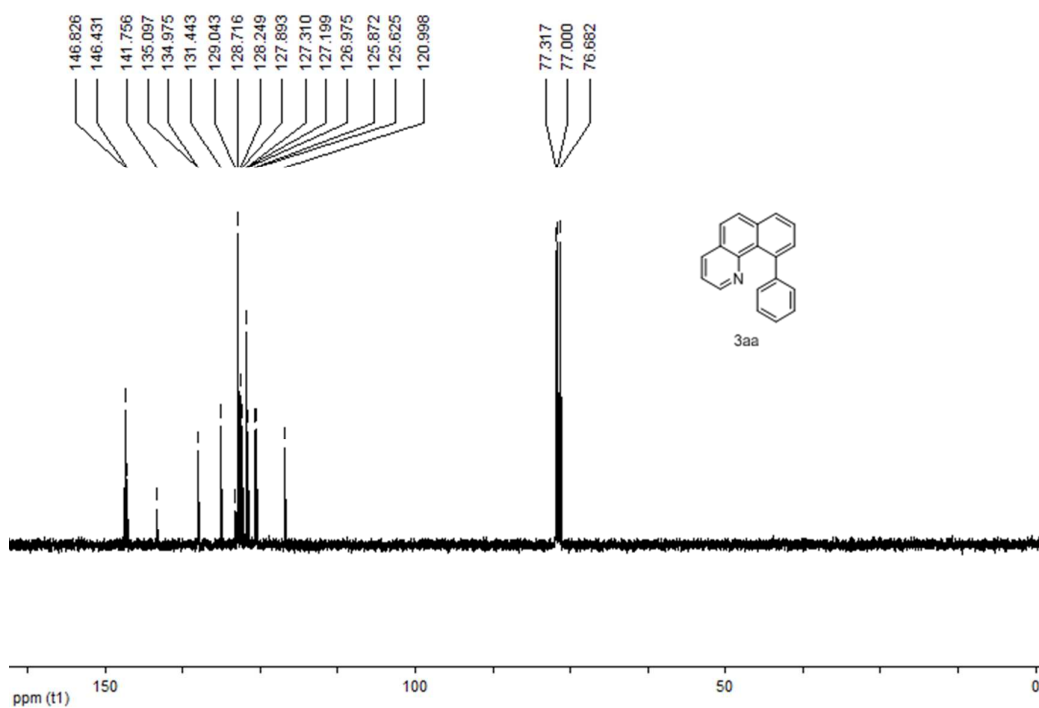

Figure S23. <sup>13</sup>C NMR for compound 3aa

**<sup>1</sup>H NMR spectrum of compound 3ab in CDCl<sub>3</sub>.**

**Chemical structure of 3ab:** Cc1ccc(cc1)-c2ccc3c(c2)nc4ccccc34

**Peak list (ppm):** 8.449, 8.442, 8.439, 8.439, 8.095, 8.075, 7.923, 7.903, 7.867, 7.845, 7.702, 7.695, 7.677, 7.657, 7.559, 7.541, 7.354, 7.321, 7.310, 7.292, 7.281, 7.260, 7.209, 7.179, 7.159, 7.140, 2.404.

**Integration values:** 1.00, 2.06, 2.09, 2.08, 3.06, 3.06, 3.00.

Chemical structure of **3ab**: Cc1ccc(cc1)-c2ccc3c(c2)cc[nH]3

<sup>13</sup>C NMR peaks (ppm): 146.853, 146.277, 141.888, 139.493, 135.115, 131.505, 129.342, 128.807, 128.298, 128.235, 127.819, 127.145, 126.996, 126.384, 125.995, 125.853, 121.019, 77.318, 77.000, 76.683, 21.566.

S18

# <sup>1</sup>H NMR and <sup>13</sup>C NMR Spectra of 3ac

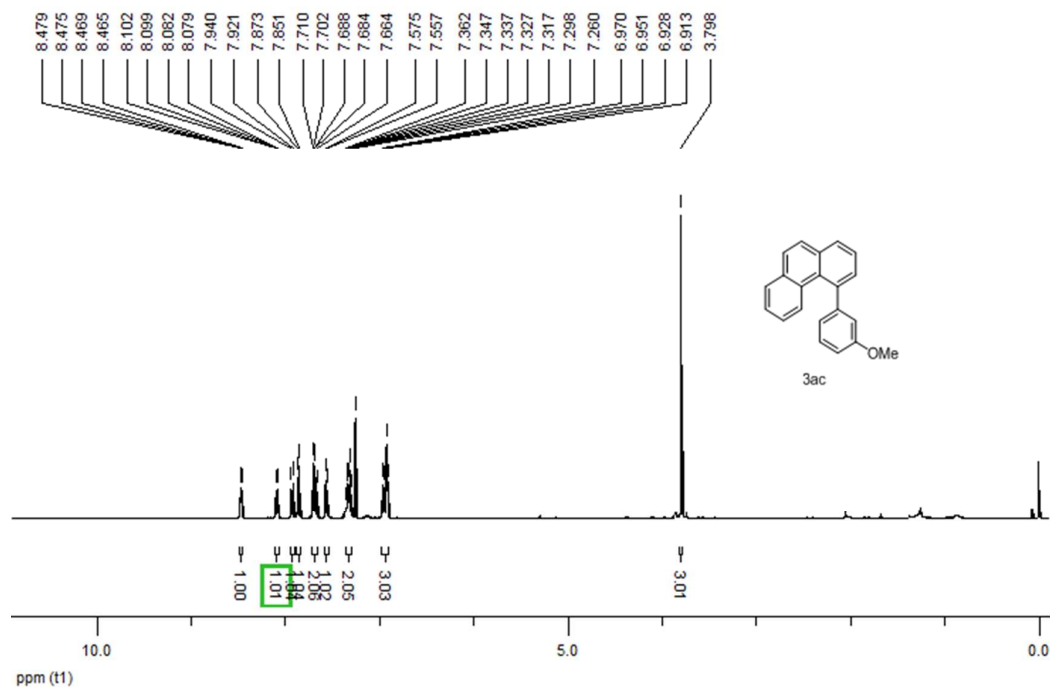

Figure S26. <sup>1</sup>H NMR for compound 3ac

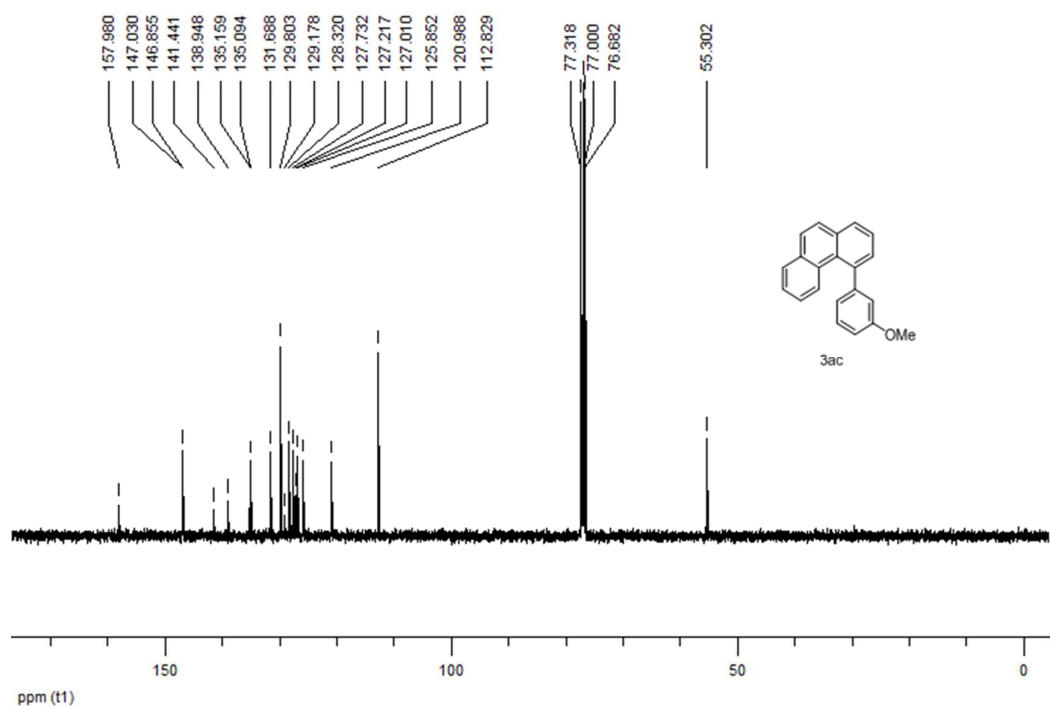

Figure S27. <sup>13</sup>C NMR for compound 3ac

Chemical structure of **3ad** is shown: 2-(4-(trifluoromethoxy)phenyl)quinoline.

<sup>1</sup>H NMR spectrum (CDCl<sub>3</sub>) of **3ad** is displayed, showing aromatic signals between 7.2 and 8.5 ppm. The integration values are provided below the peaks, with 1.03 highlighted in a green box.

148.577  
148.327  
146.959  
146.470  
140.008  
135.234  
134.980  
131.155  
128.892  
128.663  
128.488  
128.178  
127.279  
127.014  
126.855  
126.114  
122.127  
121.973  
121.221  
119.425  
118.264  
77.318  
77.000  
76.683

3ad

COc1ccc(cc1C2=CNc3ccccc23)OC(F)(F)F

S20

**$^{19}\text{F}$  NMR for compound 3ad**

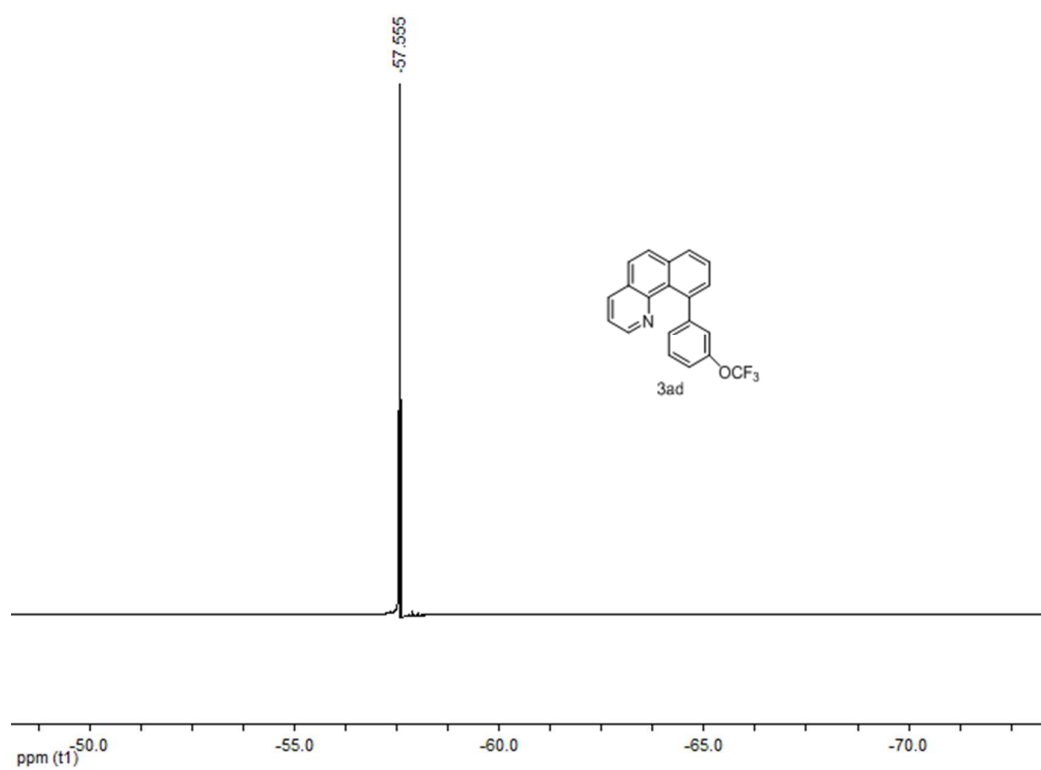

**Figure S30.  $^{19}\text{F}$  NMR for compound 3ad**

Chemical structure of **3ae** is shown as an inset: c1ccc(cc1-c2ccc3ccccc3n2)-c4ccc(cc4)[N+](=O)[O-].

The <sup>1</sup>H NMR spectrum (CDCl<sub>3</sub>) displays the following chemical shifts (ppm) and integration values:

| Chemical Shift (ppm) | Integration |
|----------------------|-------------|
| 8.365                | 1.00        |
| 8.359                | 1.00        |
| 8.356                | 1.00        |
| 8.241                | 1.00        |
| 8.125                | 1.00        |
| 8.105                | 1.00        |
| 8.010                | 1.00        |
| 7.990                | 1.00        |
| 7.902                | 1.00        |
| 7.880                | 1.00        |
| 7.748                | 1.00        |
| 7.723                | 1.00        |
| 7.696                | 1.00        |
| 7.676                | 1.00        |
| 7.562                | 1.00        |
| 7.541                | 1.00        |
| 7.529                | 1.00        |
| 7.511                | 1.00        |
| 7.359                | 1.00        |
| 7.348                | 1.00        |
| 7.340                | 1.00        |
| 7.329                | 1.00        |
| 7.260                | 1.00        |

Chemical structure of **3ae** (2-(4-nitrophenyl)quinoline) is shown in the top right corner.

The <sup>13</sup>C NMR spectrum (CDCl<sub>3</sub>) displays the following chemical shifts (ppm):

| Chemical Shift (ppm) |
|----------------------|
| 147.952              |
| 147.760              |
| 146.890              |
| 146.224              |
| 138.971              |
| 135.446              |
| 135.041              |
| 134.995              |
| 131.144              |
| 128.951              |
| 128.725              |
| 128.202              |
| 127.924              |
| 127.352              |
| 127.098              |
| 126.262              |
| 123.946              |
| 121.373              |
| 120.756              |
| 77.317               |
| 77.000               |
| 76.682               |

S22

[illegible]

Chemical structure of **3af** is shown as an inset: Cc1ccc(cc1)-c2ccc3c(c2)c4ccccc4n3.

13C NMR spectrum (ppm (t1)) showing peaks at the following chemical shifts (ppm):

- 147.424
- 147.058
- 146.427
- 141.079
- 135.848
- 135.014
- 134.664
- 130.714
- 128.709
- 128.411
- 127.922
- 127.849
- 127.207
- 126.953
- 125.882
- 125.795
- 125.408
- 125.064
- 120.922
- 77.317
- 77.000
- 76.682
- 20.147

S23

# <sup>1</sup>H NMR and <sup>13</sup>C NMR Spectra of 3ag

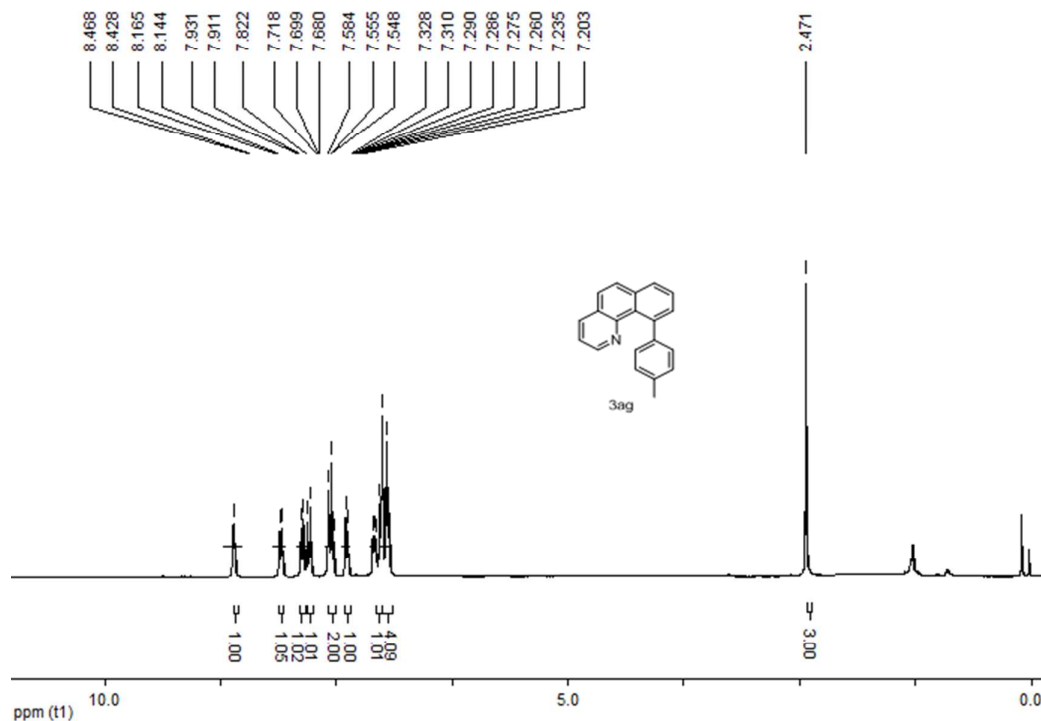

Figure S35. <sup>1</sup>H NMR for compound 3ag

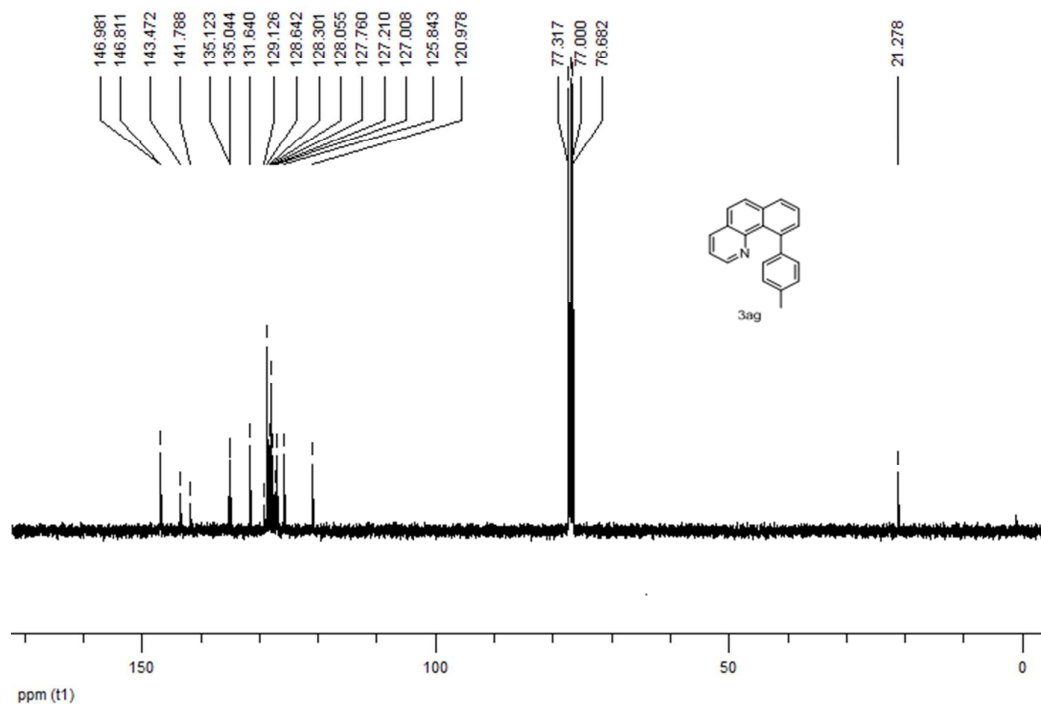

Figure S36. <sup>13</sup>C NMR for compound 3ag



[illegible]

148.426  
146.956  
146.805  
143.301  
141.787  
135.107  
135.030  
131.538  
129.180  
128.343  
128.300  
127.727  
127.163  
127.004  
125.828  
124.189  
120.961

77.317  
77.000  
76.882

34.511  
31.551

3ah

ppm (t1)

S25

[illegible]

Chemical structure of 3ai is shown in the top right corner. The structure is a tricyclic system consisting of a benzene ring fused to a pyridine ring, which is further fused to another benzene ring. A methoxy group (OMe) is attached to the benzene ring at the 3-position.

The <sup>13</sup>C NMR spectrum (ppm (t1)) shows the following peaks (ppm):

- 157.990
- 147.039
- 146.864
- 138.957
- 135.168
- 135.104
- 131.694
- 129.810
- 129.192
- 128.329
- 127.736
- 127.228
- 127.018
- 125.859
- 120.994
- 112.837
- 77.318
- 77.000
- 76.683
- 55.313

S26

[illegible]

Chemical structure of **3aj** is shown in the upper right. The structure is a benzimidazole derivative with an ethyl ester group (COOEt) attached to the benzene ring.

The <sup>13</sup>C NMR spectrum (ppm (t1)) shows the following peaks (ppm):

- 166.266
- 151.477
- 146.853
- 144.270
- 135.180
- 134.893
- 130.949
- 130.122
- 130.047
- 128.688
- 128.359
- 128.150
- 127.223
- 127.151
- 126.984
- 126.040
- 121.170
- 77.318
- 77.000
- 76.682
- 61.035
- 14.309

S27

# <sup>1</sup>H NMR and <sup>13</sup>C NMR Spectra of 3ak

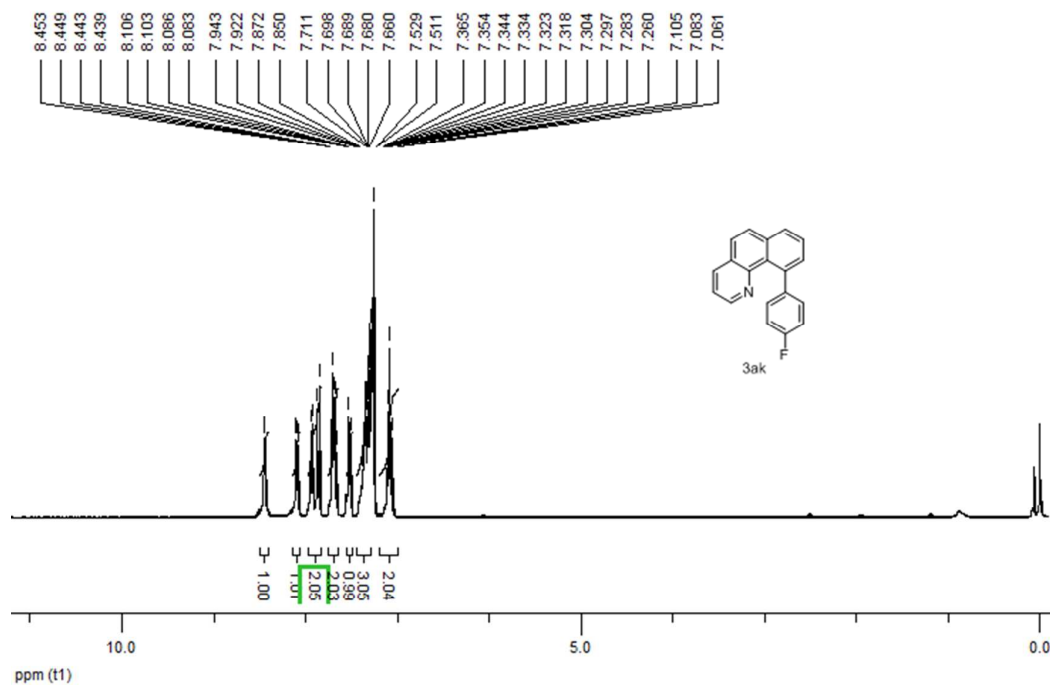

Figure S43. <sup>1</sup>H NMR for compound 3ak

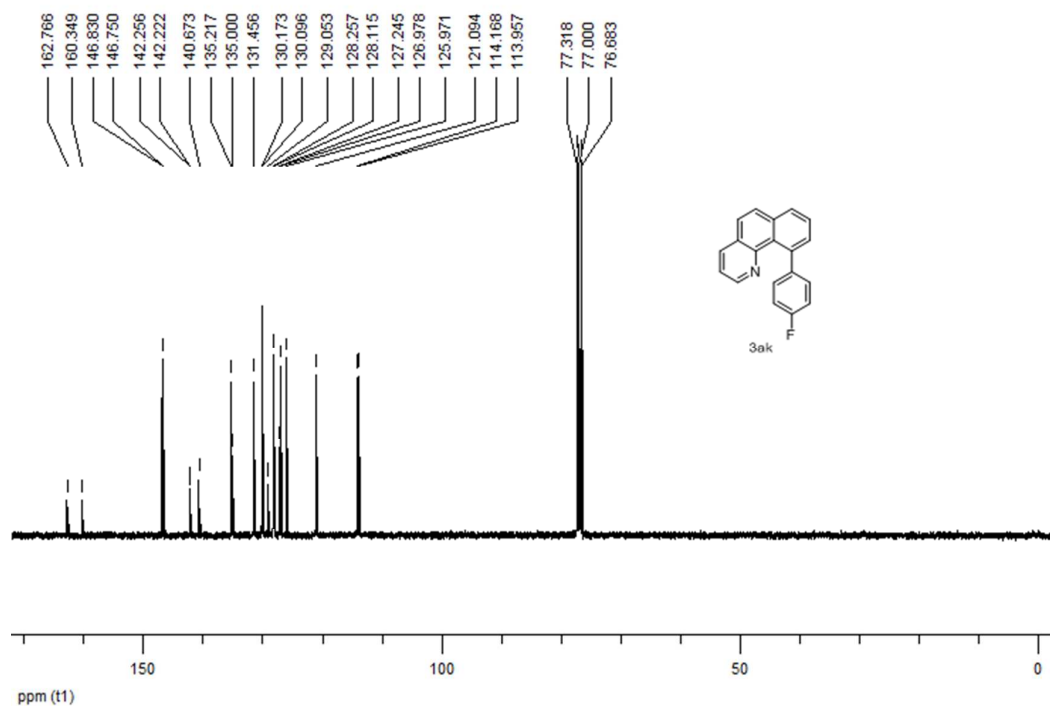

Figure S44. <sup>13</sup>C NMR for compound 3ak

**$^{19}\text{F}$  NMR for compound 3ak**

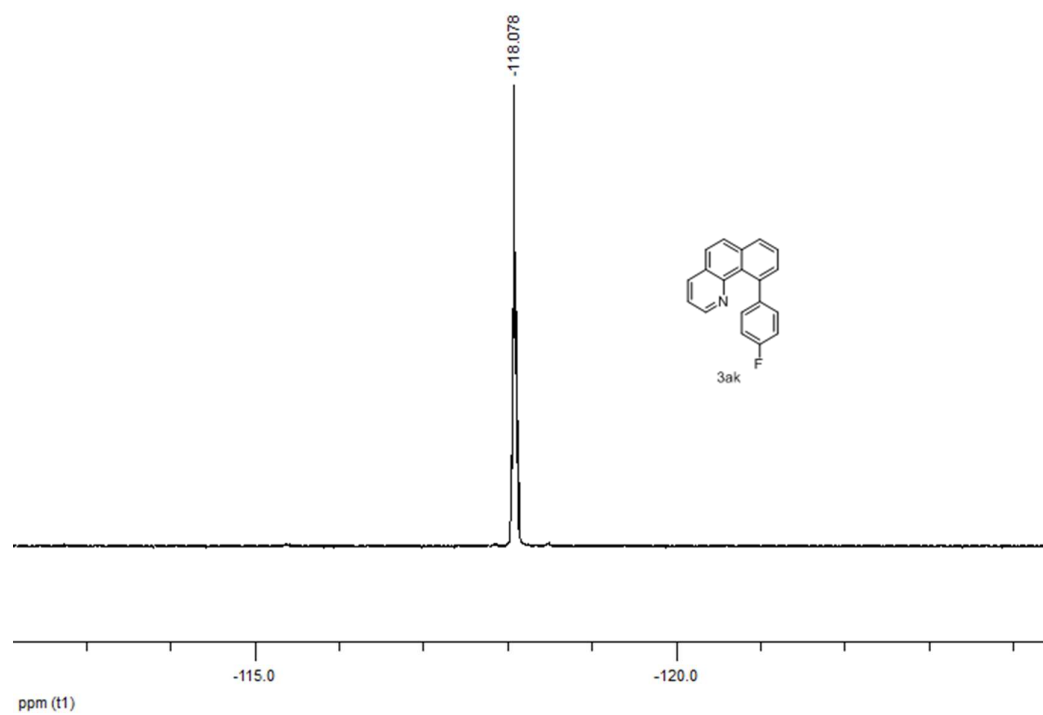

**Figure S45.  $^{19}\text{F}$  NMR for compound 3ak**

Chemical structure of **3al** (2-(4-chlorophenyl)quinoline) is shown. The <sup>1</sup>H NMR spectrum (CDCl<sub>3</sub>) displays aromatic signals in the range of 7.2–8.5 ppm. The integration values for the peaks are 1.00, 1.06, 1.04, 1.01, and 1.05. The chemical shifts (ppm) for the peaks are listed at the top: 8.490, 8.483, 8.108, 8.088, 7.960, 7.941, 7.881, 7.859, 7.719, 7.695, 7.675, 7.530, 7.512, 7.408, 7.388, 7.333, 7.321, 7.300, and 7.260.

Chemical structure of 3al: c1ccc(cc1)-c2nc3ccccc3n2

<sup>13</sup>C NMR peaks (ppm):

| Peak Label | Chemical Shift (ppm) |
|------------|----------------------|
| 146.838    | 146.838              |
| 146.810    | 146.810              |
| 146.593    | 146.593              |
| 146.561    | 146.561              |
| 144.861    | 144.861              |
| 140.336    | 140.336              |
| 135.213    | 135.213              |
| 134.953    | 134.953              |
| 131.471    | 131.471              |
| 131.284    | 131.284              |
| 130.090    | 130.090              |
| 130.058    | 130.058              |
| 128.852    | 128.852              |
| 128.205    | 128.205              |
| 127.414    | 127.414              |
| 127.215    | 127.215              |
| 127.182    | 127.182              |
| 126.989    | 126.989              |
| 125.992    | 125.992              |
| 121.130    | 121.130              |
| 77.319     | 77.319               |
| 77.000     | 77.000               |
| 76.883     | 76.883               |

S30

# <sup>1</sup>H NMR and <sup>13</sup>C NMR Spectra of 3am

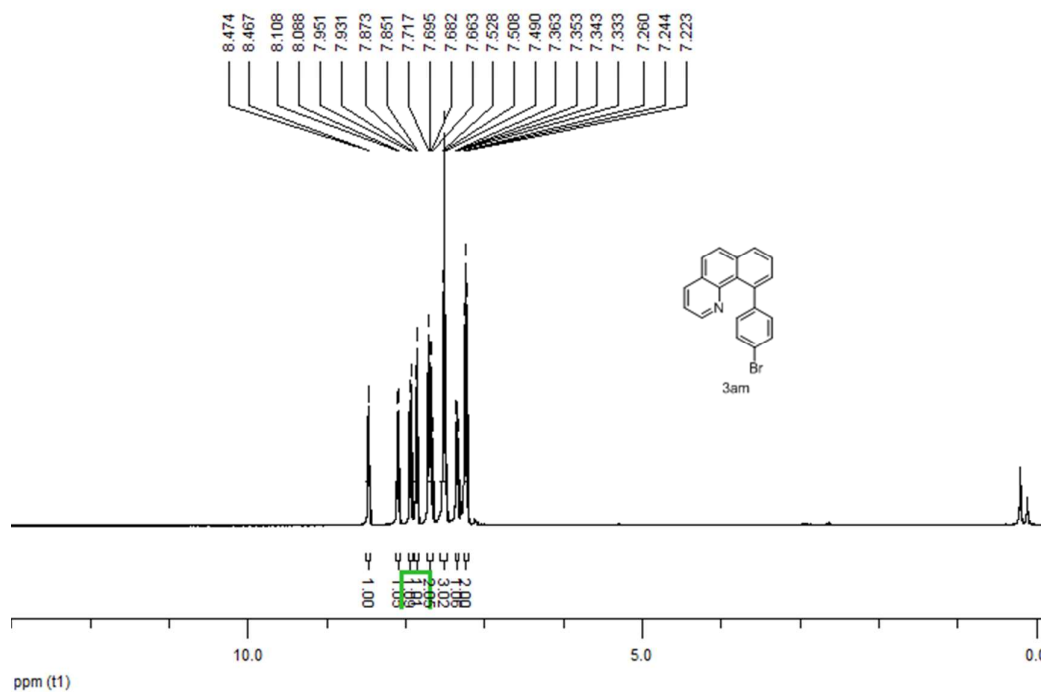

Figure S48. <sup>1</sup>H NMR for compound 3am

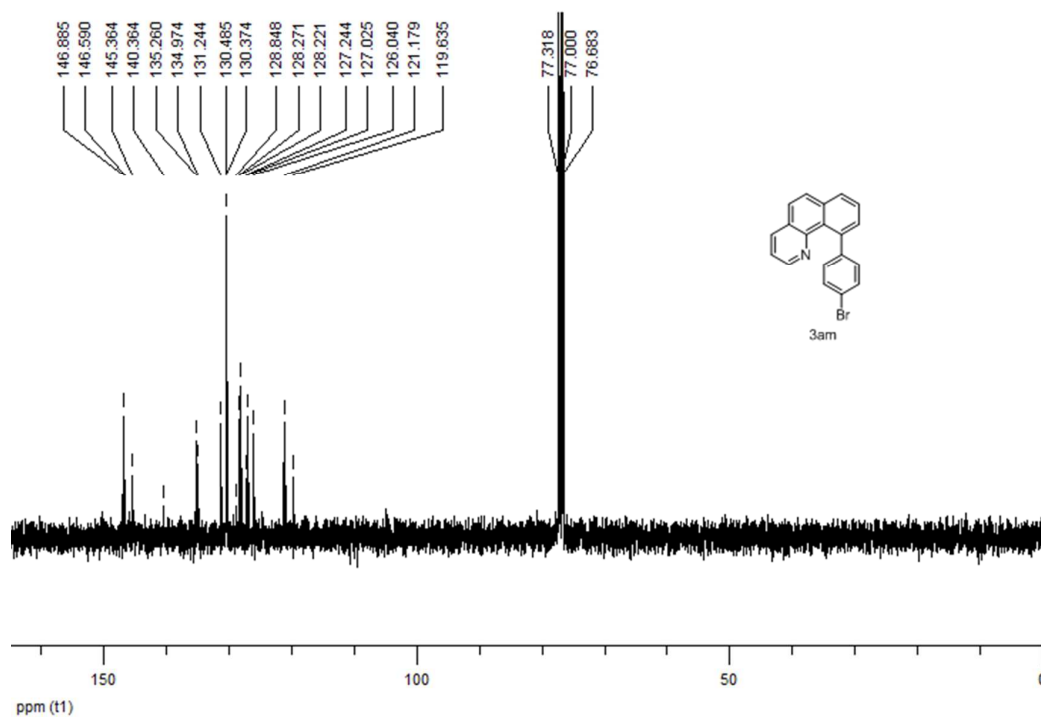

Figure S49. <sup>13</sup>C NMR for compound 3am

# <sup>1</sup>H NMR and <sup>13</sup>C NMR Spectra of 3an

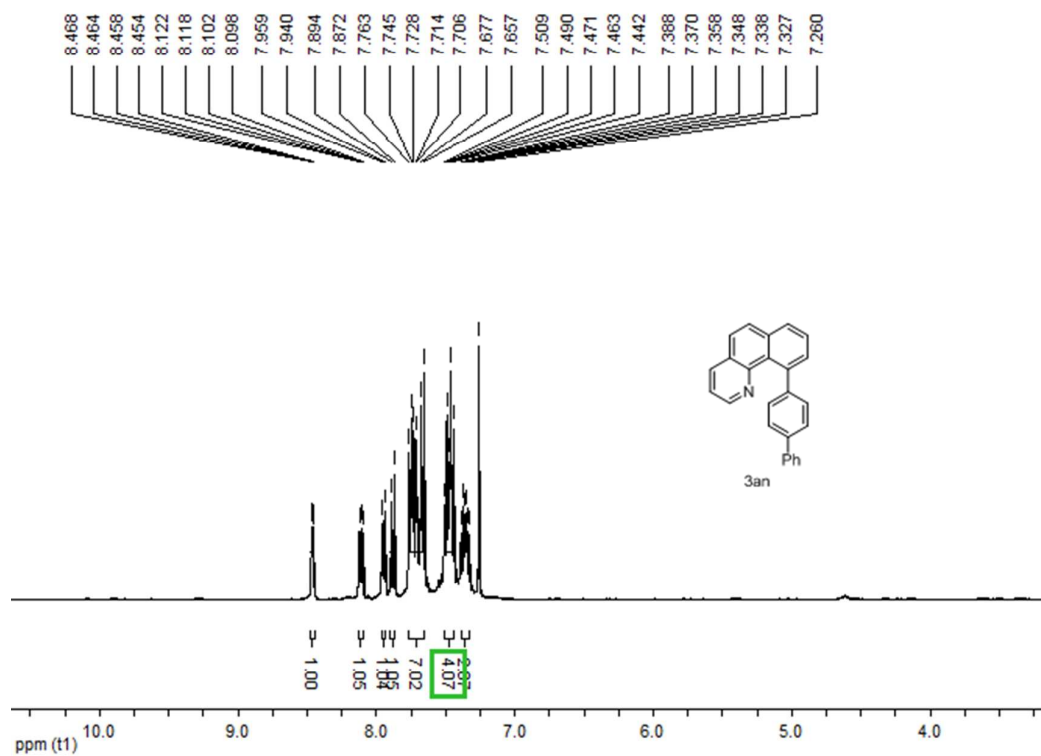

Figure S50. <sup>1</sup>H NMR for compound 3an

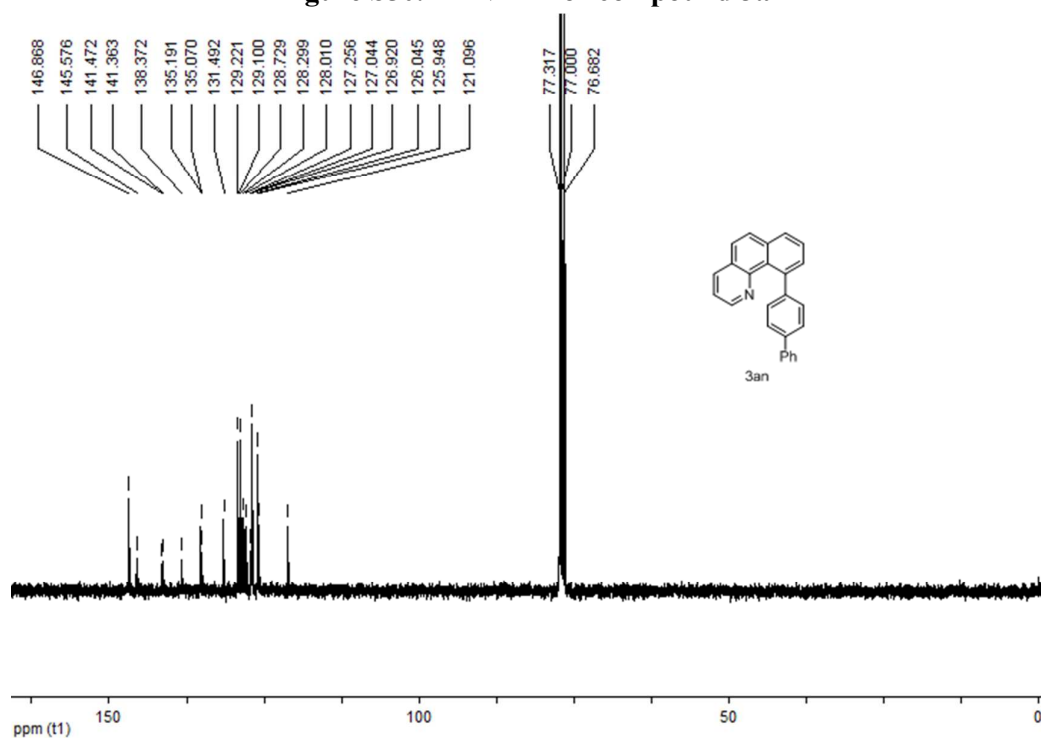

Figure S51. <sup>13</sup>C NMR for compound 3an



Chemical structure of **3ao** (2-(4-(trifluoromethyl)phenyl)quinoline) is shown in the top right. The <sup>1</sup>H NMR spectrum (CDCl<sub>3</sub>) displays aromatic signals between 7.2 and 8.4 ppm. A green box highlights the peaks at 7.260, 7.331, 7.341, 7.350, 7.448, 7.468, 7.516, 7.564, 7.589, 7.644, 7.684, 7.710, 7.717, 7.729, 7.739, 7.874, 7.896, 7.967, 7.987, 8.102, 8.122, 8.401, and 8.408 ppm. The chemical shift values (ppm) are listed above the peaks, and the integration values are shown below the peaks.

| Chemical Shift (ppm) | Integration |
|----------------------|-------------|
| 7.260                | 1.00        |
| 7.331                | 1.00        |
| 7.341                | 1.00        |
| 7.350                | 1.00        |
| 7.448                | 1.00        |
| 7.468                | 1.00        |
| 7.516                | 1.00        |
| 7.564                | 1.00        |
| 7.589                | 1.00        |
| 7.644                | 1.00        |
| 7.684                | 1.00        |
| 7.710                | 1.00        |
| 7.717                | 1.00        |
| 7.729                | 1.00        |
| 7.739                | 1.00        |
| 7.874                | 1.00        |
| 7.896                | 1.00        |
| 7.967                | 1.00        |
| 7.987                | 1.00        |
| 8.102                | 1.00        |
| 8.122                | 1.00        |
| 8.401                | 1.00        |
| 8.408                | 1.00        |

Chemical structure of 3ao: FC(F)(F)c1ccc(cc1)-c2ccc3c(c2)cccnc3

<sup>13</sup>C NMR spectrum (CDCl<sub>3</sub>) of compound 3ao. The spectrum shows a cluster of peaks between 120 and 150 ppm and a triplet for the CDCl<sub>3</sub> solvent at 77.000 ppm.

| Chemical Shift (ppm) |
|----------------------|
| 150.236              |
| 146.915              |
| 146.442              |
| 140.251              |
| 135.286              |
| 134.963              |
| 131.082              |
| 128.990              |
| 128.874              |
| 128.526              |
| 128.207              |
| 127.981              |
| 127.863              |
| 127.293              |
| 127.053              |
| 126.135              |
| 124.776              |
| 124.239              |
| 124.202              |
| 124.152              |
| 121.251              |
| 77.317               |
| 77.000               |
| 76.682               |

S33

**$^{19}\text{F}$  NMR for compound 3ao**

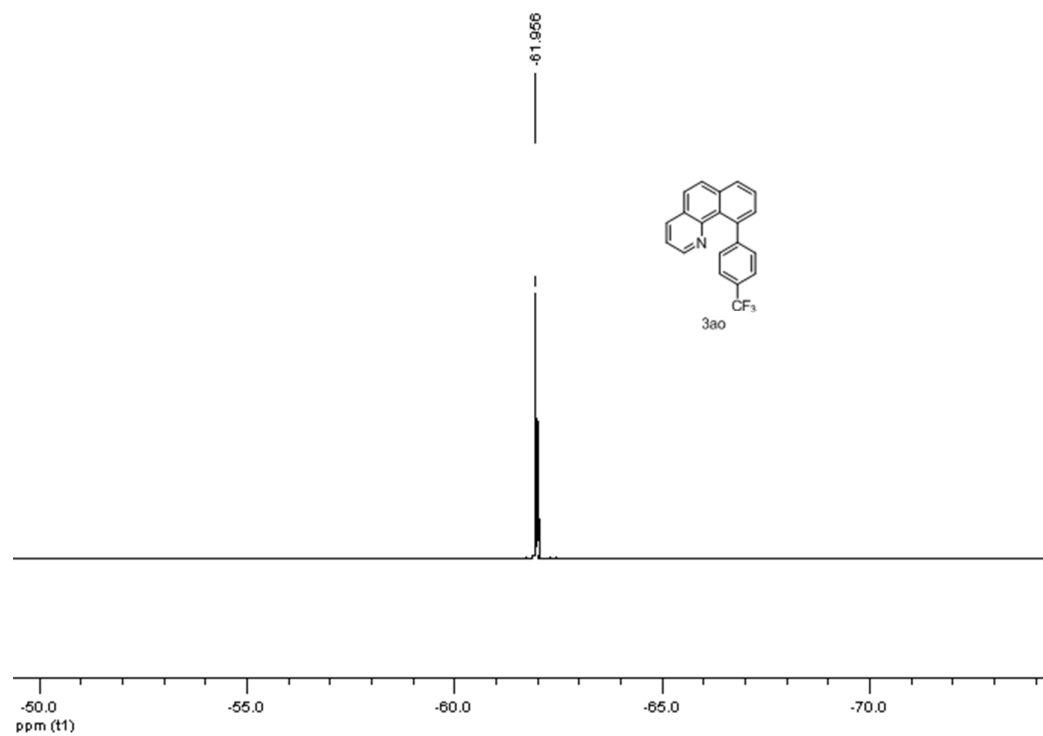

**Figure S54.  $^{19}\text{F}$  NMR for compound 3ao**

[illegible]

Chemical structure of 3ap is shown as an inset. The structure is a tricyclic compound consisting of a pyridine ring fused to a benzene ring, which is further fused to another benzene ring. The label "3ap" is placed below the structure.

13C NMR spectrum (ppm (t1)) of compound 3ap. The spectrum shows a cluster of peaks between 120 and 150 ppm and a triplet of peaks around 77 ppm. The chemical structure of 3ap is shown as an inset.

| Peak (ppm) |
|------------|
| 146.917    |
| 146.714    |
| 144.486    |
| 141.526    |
| 135.142    |
| 135.046    |
| 133.786    |
| 132.174    |
| 131.909    |
| 129.417    |
| 129.093    |
| 128.313    |
| 128.122    |
| 128.064    |
| 127.583    |
| 127.234    |
| 127.171    |
| 125.945    |
| 125.653    |
| 125.495    |
| 125.419    |
| 125.121    |
| 121.076    |
| 77.318     |
| 77.000     |
| 76.683     |

S35

# <sup>1</sup>H NMR and <sup>13</sup>C NMR Spectra of 3aq

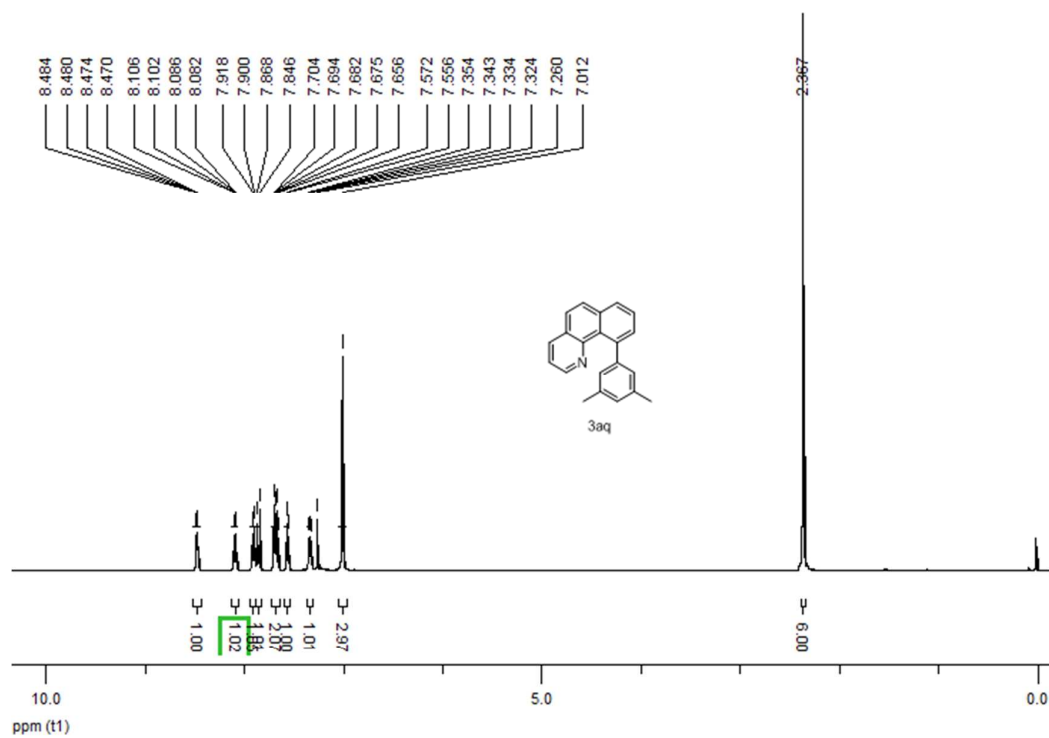

Figure S57. <sup>1</sup>H NMR for compound 3aq

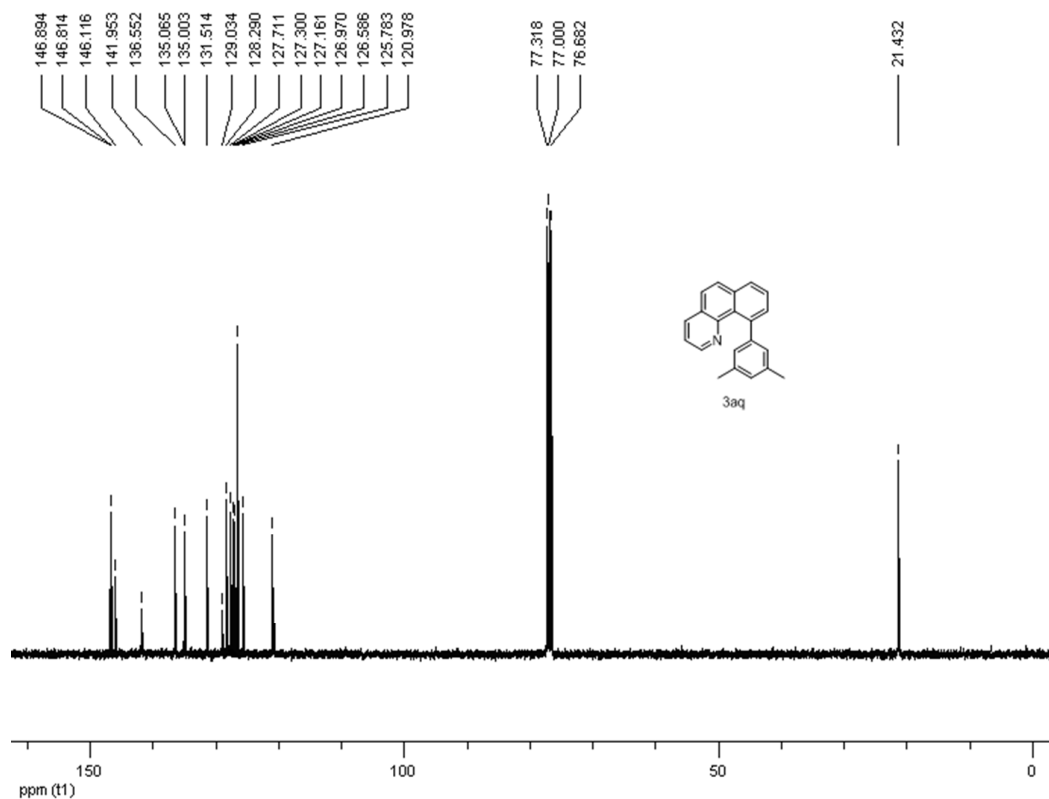

Figure S58. <sup>13</sup>C NMR for compound 3aq

Chemical structure of **3ar** is shown: 2-(4,4-difluorophenyl)quinoline.

<sup>1</sup>H NMR spectrum (CDCl<sub>3</sub>) of **3ar** is displayed, showing aromatic signals between 7.2 and 8.4 ppm. Integration values are provided below the peaks: 1.00, 1.00, 1.00, 2.03, 1.04, 1.00, 1.00.

Chemical structure of **3ar** is shown in the top right corner. The structure is a tricyclic system consisting of a quinoline ring fused to a benzene ring, which is further substituted with a 4-(trifluoromethyl)phenyl group. The trifluoromethyl group is represented as  $\text{F}_3\text{C}$ .

The  $^{13}\text{C}$  NMR spectrum displays the following chemical shifts (ppm) for the peaks:

- 148.083
- 146.868
- 146.046
- 138.419
- 135.483
- 135.033
- 131.195
- 130.732
- 130.407
- 130.080
- 129.756
- 129.256
- 128.643
- 128.203
- 127.345
- 127.155
- 126.359
- 125.211
- 122.503
- 121.559
- 119.532
- 119.493
- 119.456
- 119.419
- 77.319
- 77.000
- 76.683

S37

**$^{19}\text{F}$  NMR for compound 3ar**

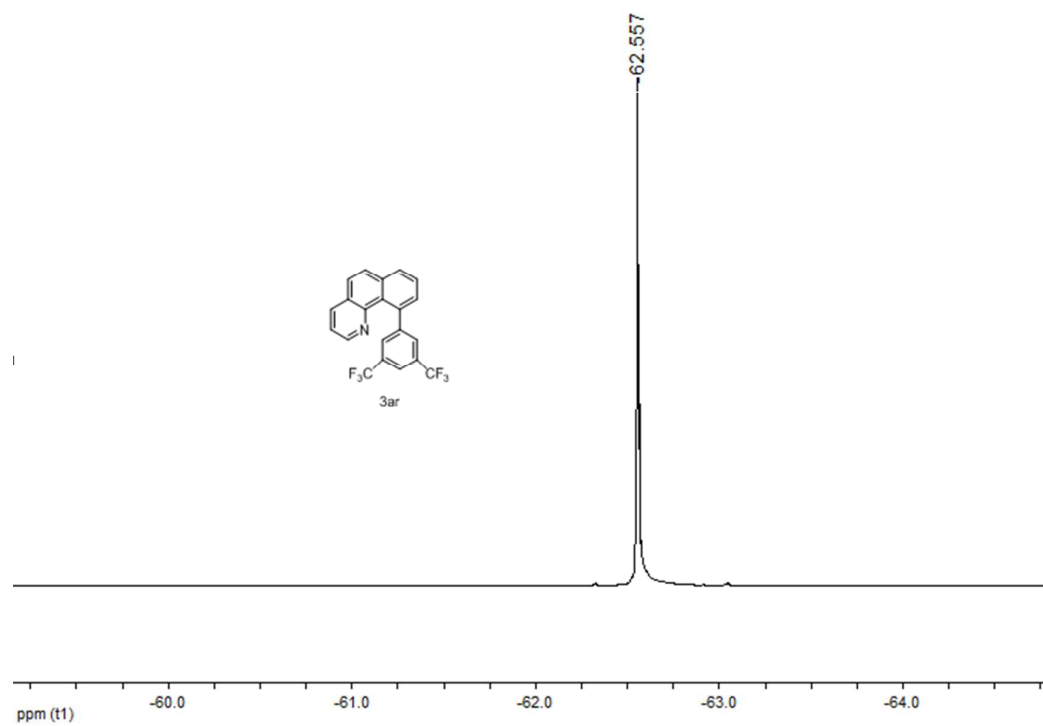

**Figure S61.  $^{19}\text{F}$  NMR for compound 3ar**

# <sup>1</sup>H NMR and <sup>13</sup>C NMR Spectra of 3as

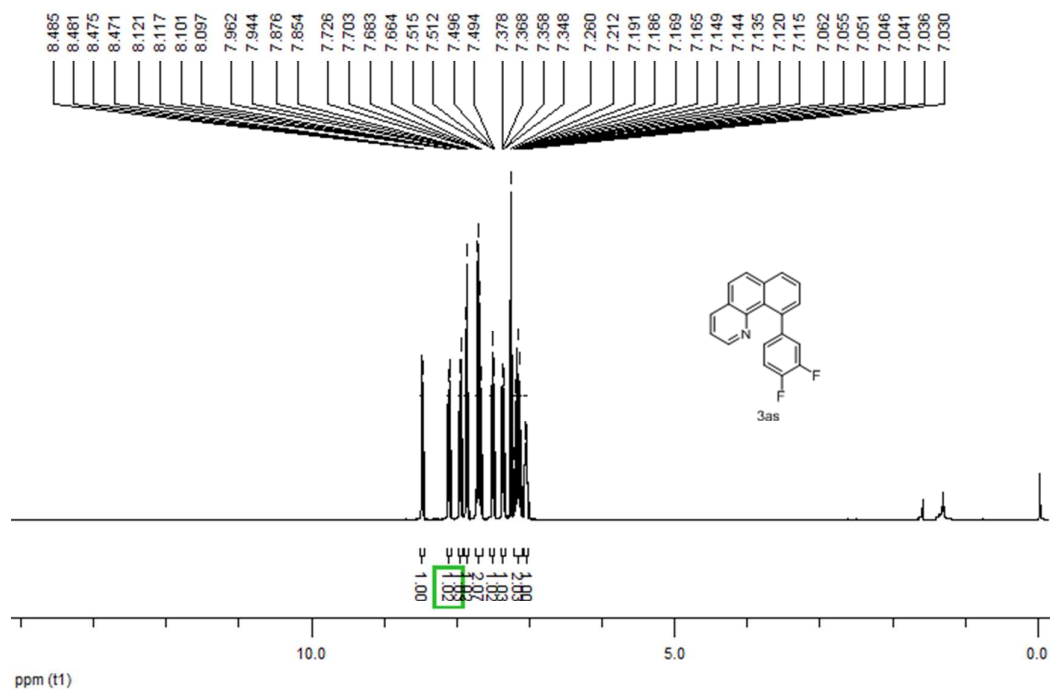

Figure S62. <sup>1</sup>H NMR for compound 3as

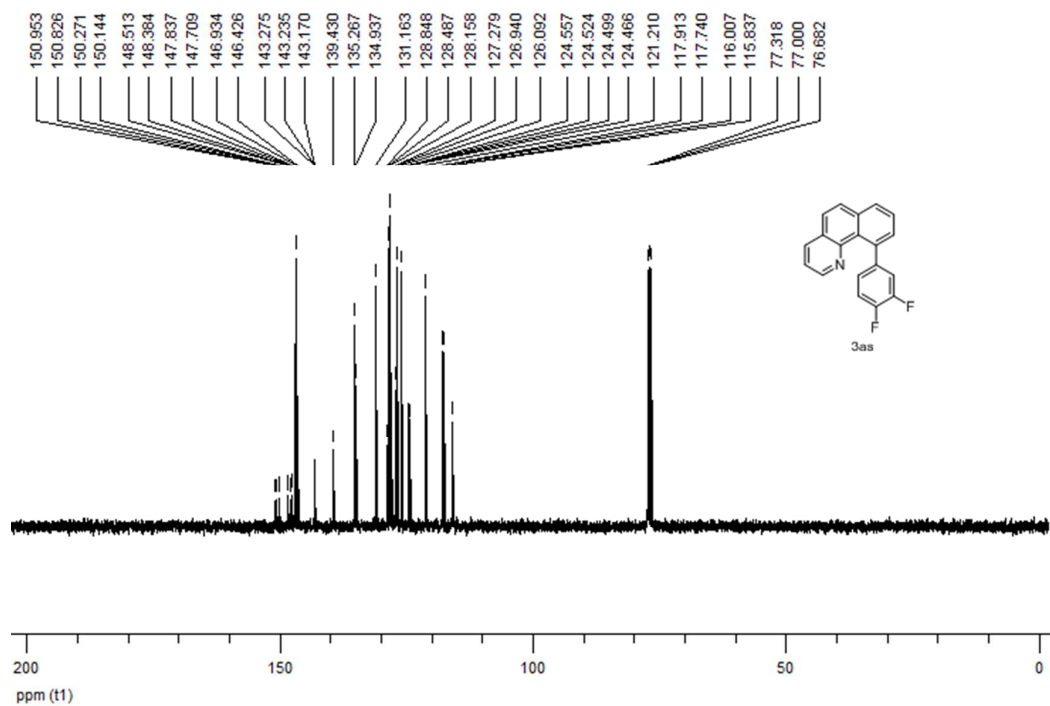

Figure S63. <sup>13</sup>C NMR for compound 3as

**$^{19}\text{F}$  NMR for compound 3as**

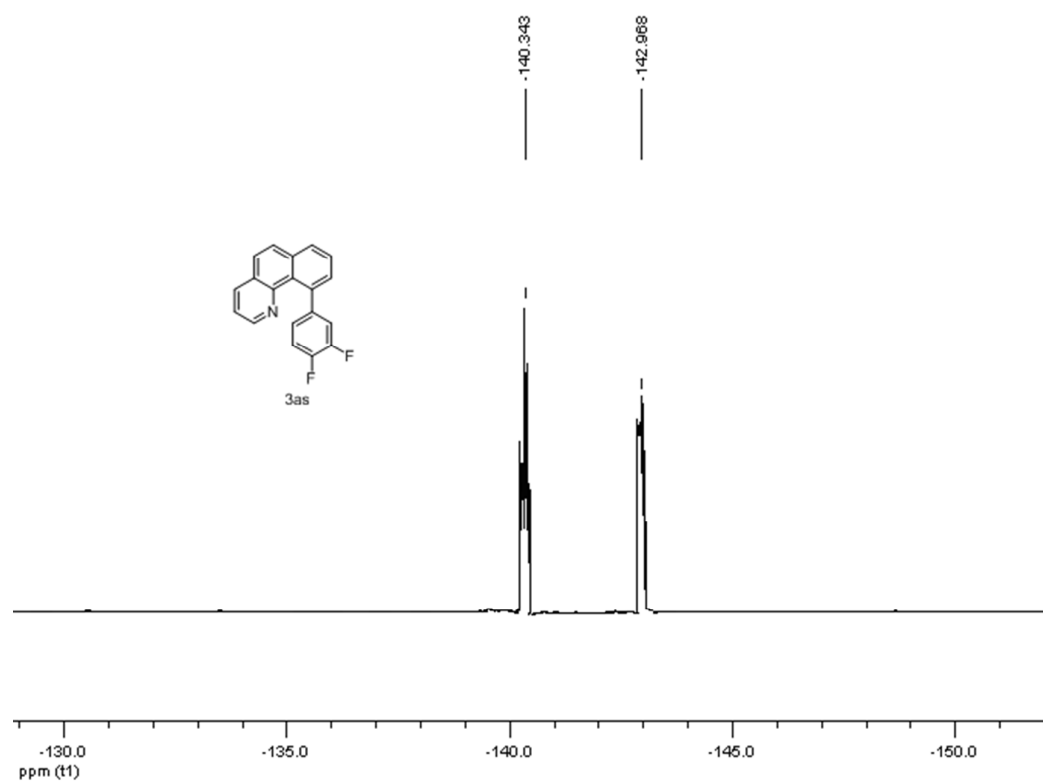

**Figure S64.  $^{19}\text{F}$  NMR for compound 3as**



Chemical structure of **3at** is shown in the top right corner of the spectrum.

Chemical structure of **3at** is shown in the top right corner. The structure is a fluorene derivative with a 2,4,6-trifluorophenyl group attached to the 9-position.

The <sup>13</sup>C NMR spectrum (t1) shows the following chemical shifts (ppm) for the peaks:

- 151.898
- 151.855
- 151.798
- 151.757
- 149.440
- 149.398
- 149.340
- 149.298
- 147.125
- 146.192
- 142.451
- 142.398
- 142.364
- 142.313
- 142.281
- 142.228
- 139.751
- 139.597
- 139.441
- 138.538
- 135.368
- 134.945
- 130.838
- 128.871
- 128.735
- 128.136
- 127.374
- 126.978
- 126.280
- 121.390
- 112.961
- 112.908
- 112.804
- 112.751
- 77.318
- 77.000
- 76.683

S41

**$^{19}\text{F}$  NMR for compound 3at**

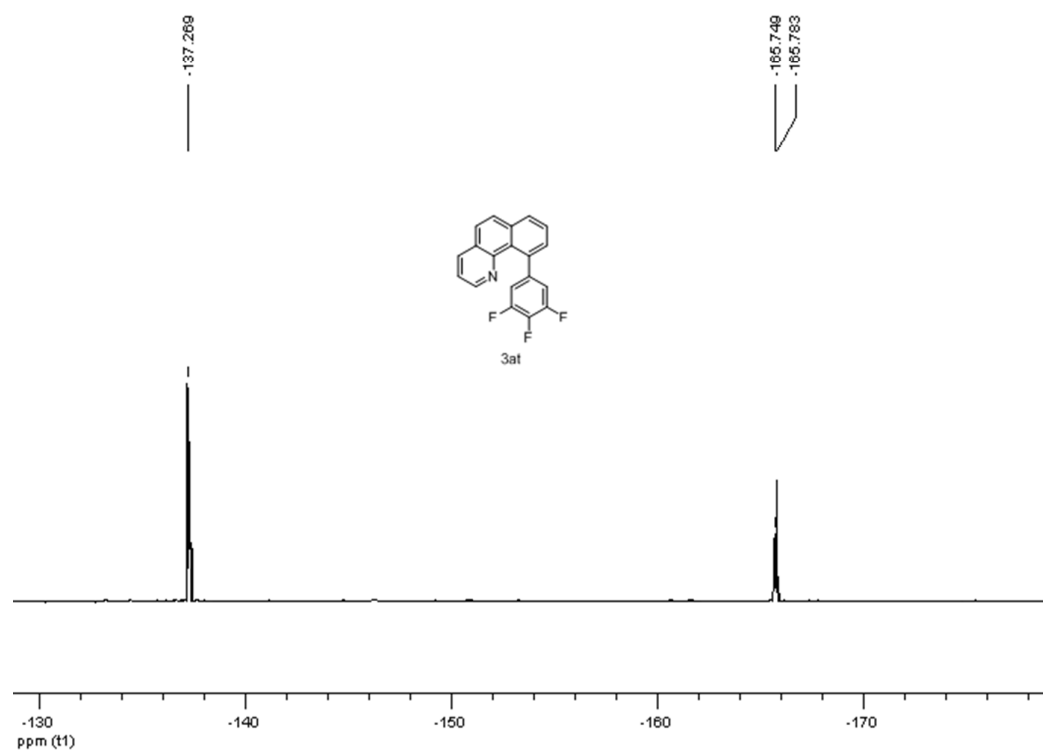

**Figure S67.  $^{19}\text{F}$  NMR for compound 3at**

Chemical structure of **3ba** is shown: Cc1ccc2c(c1)c3ccccc3n2.

<sup>1</sup>H NMR spectrum (CDCl<sub>3</sub>) of **3ba** is displayed, showing peaks in the aromatic region (7.2–8.4 ppm) and a singlet at 3.07 ppm. Integration values are provided below the peaks.

| Chemical Shift (ppm) | Integration |
|----------------------|-------------|
| 8.371                | 1.00        |
| 8.364                | 1.00        |
| 8.360                | 1.00        |
| 8.121                | 1.00        |
| 8.100                | 1.00        |
| 8.009                | 1.00        |
| 8.006                | 1.00        |
| 7.989                | 1.00        |
| 7.966                | 1.00        |
| 7.766                | 1.00        |
| 7.747                | 1.00        |
| 7.728                | 1.00        |
| 7.601                | 1.00        |
| 7.583                | 1.00        |
| 7.554                | 1.00        |
| 7.439                | 1.00        |
| 7.419                | 1.00        |
| 7.403                | 1.00        |
| 7.382                | 1.00        |
| 7.372                | 1.00        |
| 7.355                | 1.00        |
| 7.298                | 1.00        |
| 7.288                | 1.00        |
| 7.278                | 1.00        |
| 7.268                | 1.00        |
| 7.260                | 1.00        |
| 3.07                 | 3.07        |

Chemical structure of **3ba** is shown as an inset: Cc1ccc2c(c1)c3ccccc3n2.

<sup>13</sup>C NMR spectrum (CDCl<sub>3</sub>) of **3ba**. The x-axis represents the chemical shift in ppm (t1), ranging from 0 to 200. The spectrum displays several peaks corresponding to the aromatic and heterocyclic carbons of the molecule, with the following chemical shifts (ppm) labeled above the peaks:

- 146.898
- 146.307
- 146.008
- 142.096
- 134.832
- 134.274
- 133.624
- 131.168
- 128.613
- 127.355
- 127.055
- 126.895
- 125.836
- 125.478
- 123.776
- 121.077

The solvent peak (CDCl<sub>3</sub>) is visible as a triplet at 77.000 ppm. Other labeled peaks include 77.319, 76.884, and 20.519 ppm.

S43

Chemical structure of **3bb** (1-(2-phenyl-1H-indol-3-yl)benzene) is shown. The <sup>1</sup>H NMR spectrum (CDCl<sub>3</sub>) displays aromatic signals. The chemical shift (ppm) and integration values are listed below the spectrum. A green box highlights the integration value for the peak at 7.583 ppm.

| Chemical Shift (ppm) | Integration |
|----------------------|-------------|
| 8.433                | 1.00        |
| 8.430                | 1.00        |
| 8.423                | 1.00        |
| 8.162                | 1.00        |
| 8.159                | 1.00        |
| 8.141                | 1.00        |
| 8.138                | 1.00        |
| 7.944                | 1.00        |
| 7.923                | 1.00        |
| 7.827                | 1.00        |
| 7.728                | 1.00        |
| 7.709                | 1.00        |
| 7.690                | 1.00        |
| 7.583                | 1.00        |
| 7.554                | 1.00        |
| 7.546                | 1.00        |
| 7.463                | 1.00        |
| 7.431                | 1.00        |
| 7.414                | 1.00        |
| 7.394                | 1.00        |
| 7.374                | 1.00        |
| 7.278                | 1.00        |
| 7.268                | 1.00        |
| 7.260                | 1.00        |
| 7.247                | 1.00        |

146.526  
141.710  
139.502  
137.952  
134.397  
133.511  
131.435  
130.269  
129.976  
128.676  
128.569  
128.491  
128.333  
127.977  
127.869  
127.352  
127.302  
126.390  
125.910  
125.598  
120.814

77.318  
77.000  
76.683

Ph

3bb

ppm (t1)

S44

# <sup>1</sup>H NMR and <sup>13</sup>C NMR Spectra of 3bc

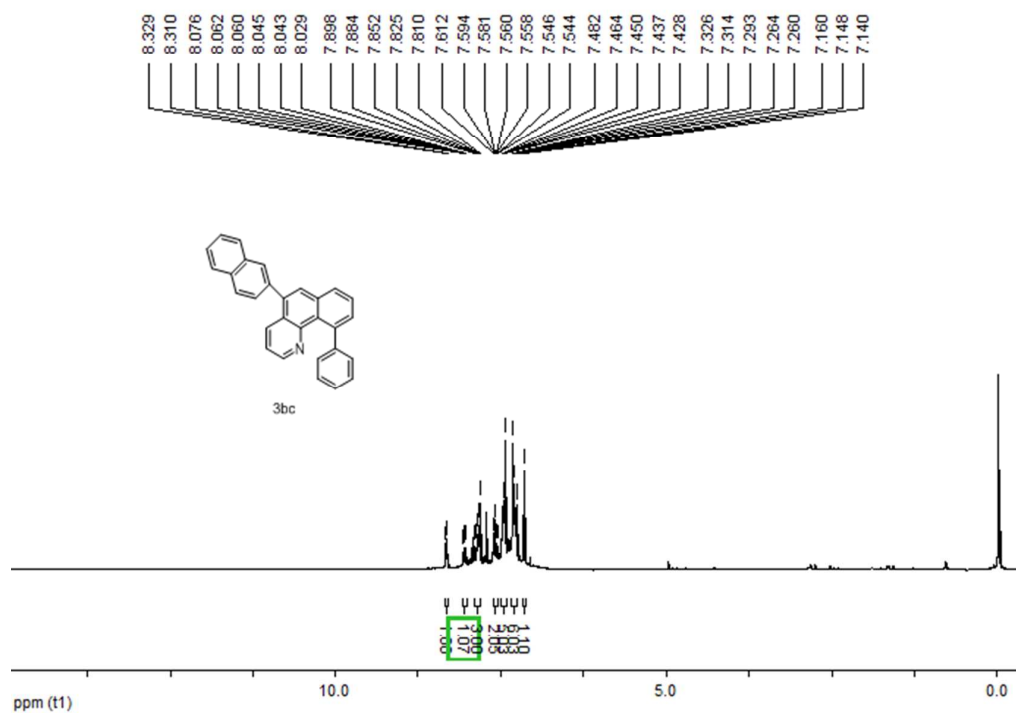

Figure S72. <sup>1</sup>H NMR for compound 3bc

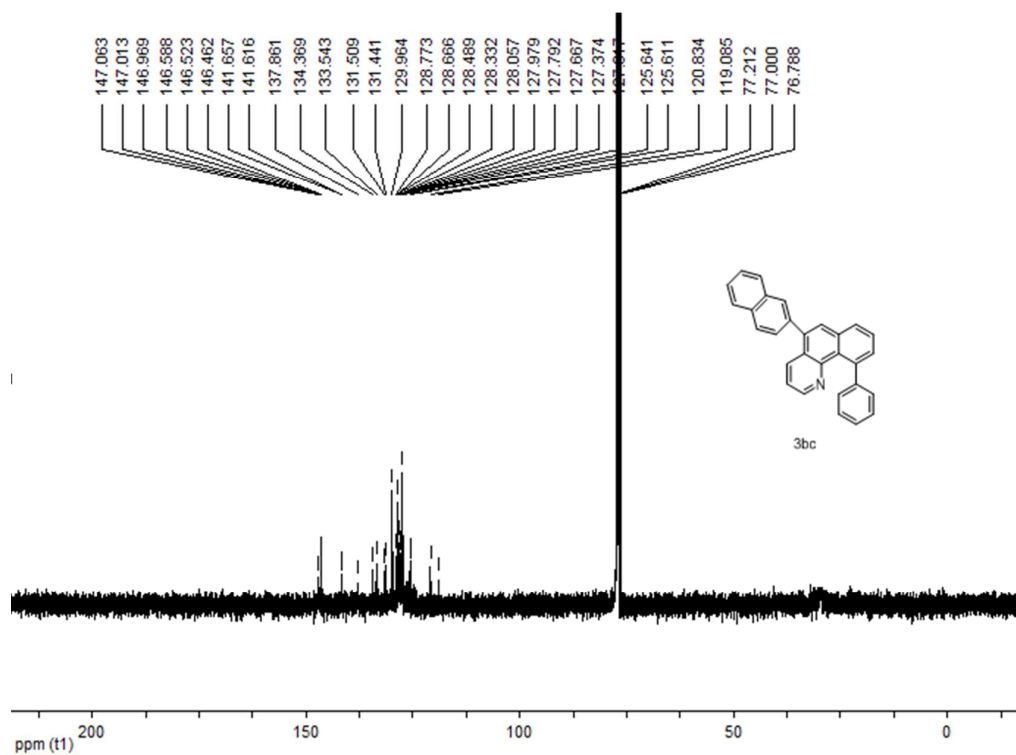

Figure S73. <sup>13</sup>C NMR for compound 3bc

# <sup>1</sup>H NMR and <sup>13</sup>C NMR Spectra of 3bd

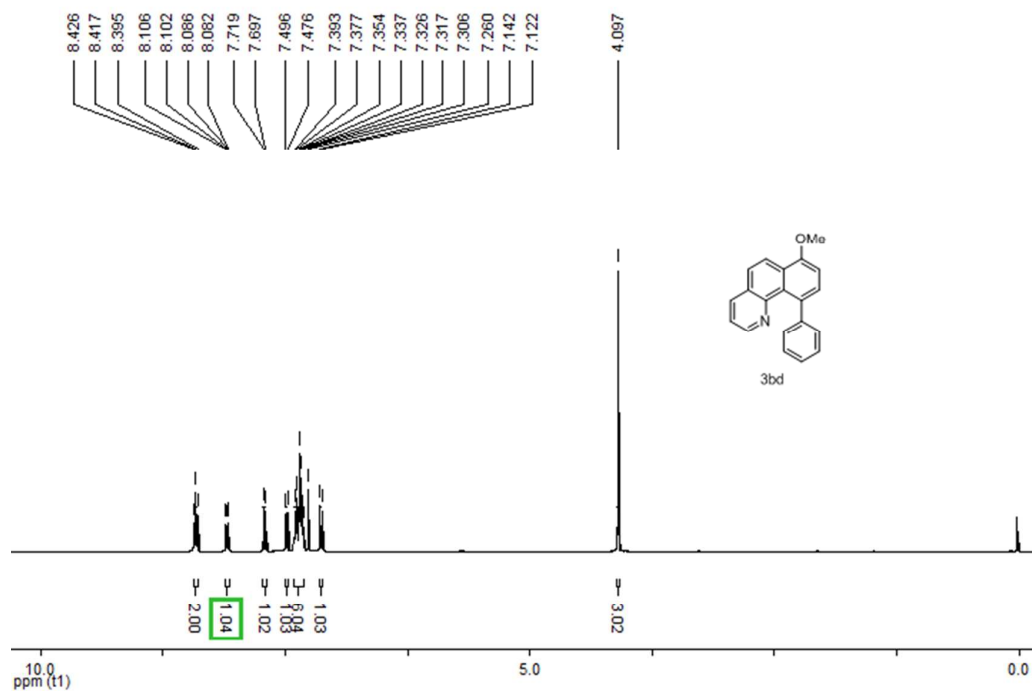

Figure S74. <sup>1</sup>H NMR for compound 3bd

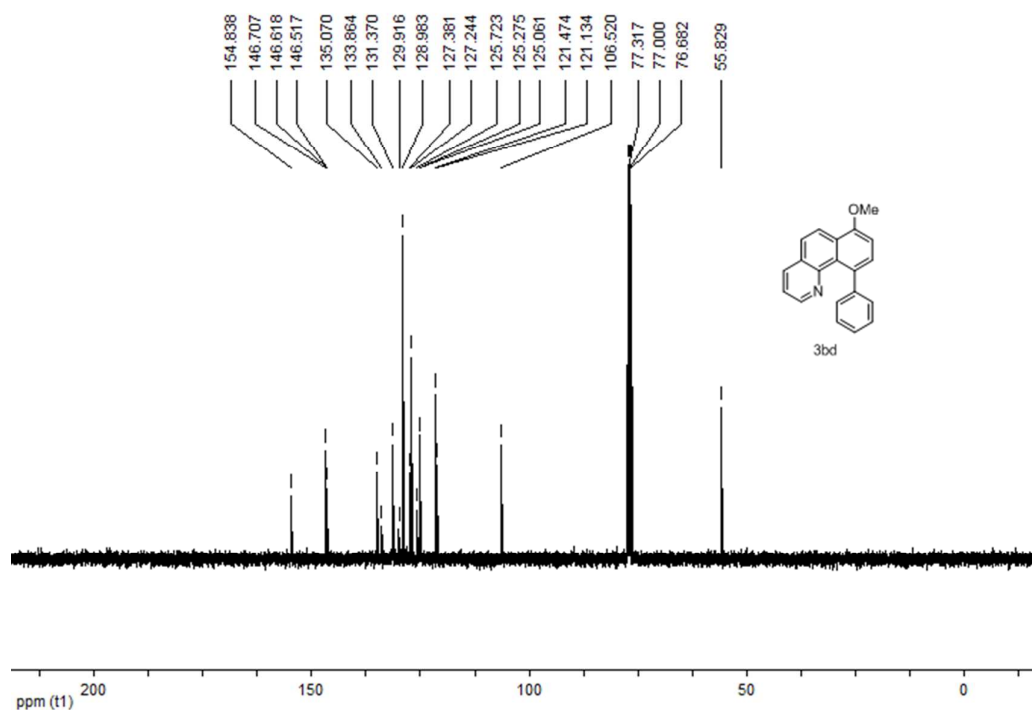

Figure S75. <sup>13</sup>C NMR for compound 3bd

[illegible]

148.881  
146.789  
146.757  
141.175  
141.004  
140.055  
134.922  
132.750  
130.801  
130.326  
129.467  
128.730  
128.639  
128.352  
127.414  
127.355  
126.872  
125.929  
125.681  
125.558  
121.205

77.318  
77.000  
76.683

3be

c1ccc(cc1)-c2ccc3c(c2)ccn3

S47

# <sup>1</sup>H NMR and <sup>13</sup>C NMR Spectra of 3bf

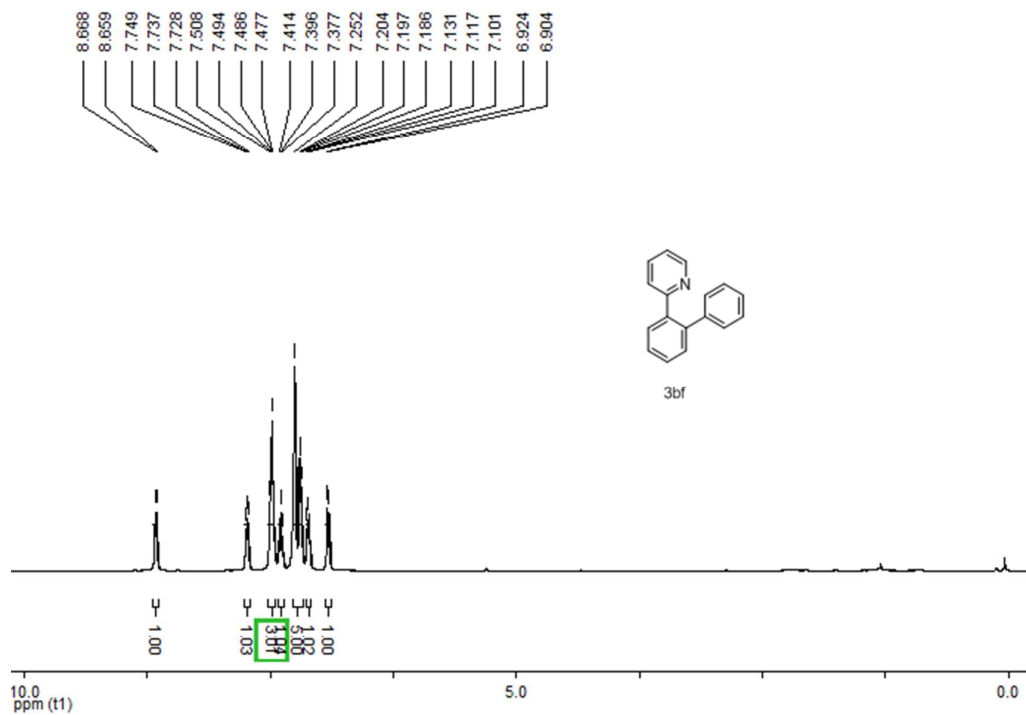

Figure S78. <sup>1</sup>H NMR for compound 3bf

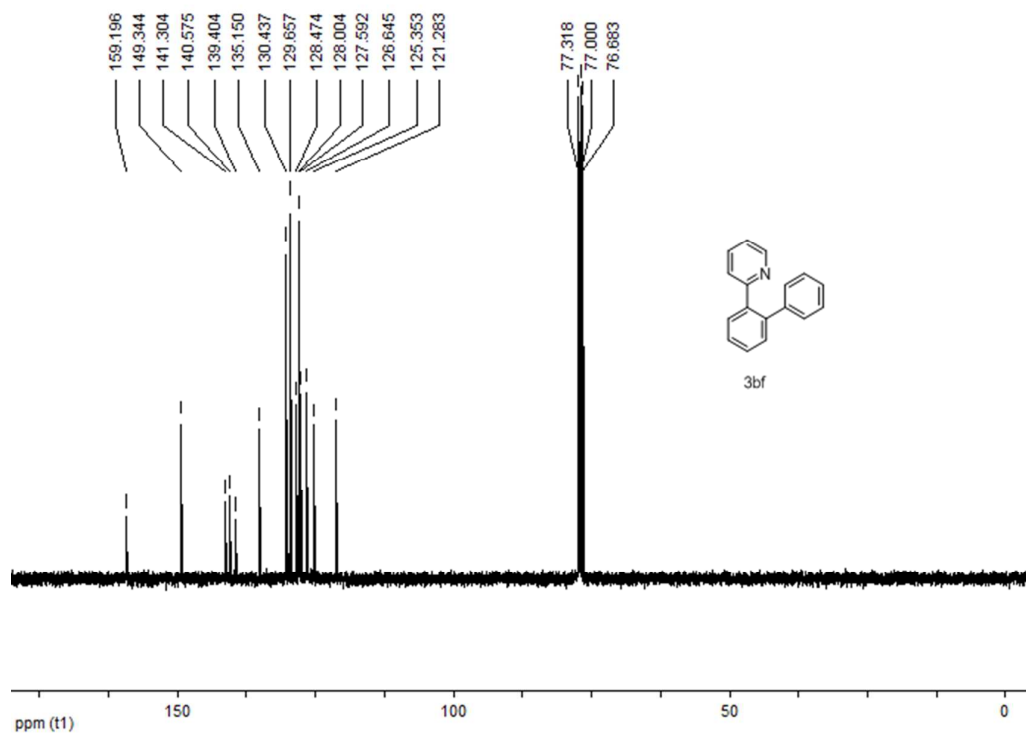

Figure S79. <sup>13</sup>C NMR for compound 3bf
